# Multiplexed Single-Molecule Epigenetic Analysis of Plasma-Isolated Nucleosomes for Cancer Diagnostics

Vadim Feduyk<sup>1+</sup>, Nir Erez<sup>1+</sup>, Noa Furth<sup>1</sup>, Olga Beresh<sup>1</sup>, Ekaterina Andreishcheva<sup>2</sup>, Abhijeet Shinde<sup>2</sup>, Daniel Jones<sup>2</sup>, Barak Bar Zakai<sup>3</sup>, Yael Mavor<sup>3</sup>, Tamar Peretz<sup>4</sup>, Ayala Hubert<sup>4</sup>, Jonathan E Cohen<sup>4</sup>, Azzam Salah<sup>4</sup>, Mark Temper<sup>4</sup>, Albert Grinshpun<sup>4</sup>, Myriam Maoz<sup>4</sup>, Aviad Zick<sup>4</sup>, Guy Ron<sup>5</sup>, Efrat Shema<sup>1\*</sup>.

<sup>1</sup>Department of Biological Regulation, Weizmann Institute of Science, Rehovot 76100, Israel

<sup>2</sup>SeqLL Inc., Woburn, MA 01801, USA

<sup>3</sup>Department of Surgery A, Kaplan Medical Center, Rehovot, Israel

<sup>4</sup>Sharett Institute of Oncology, Hebrew University - Hadassah Medical Center, Jerusalem, Israel.

<sup>5</sup>Racah Institute of Physics, Hebrew University, Jerusalem 91904, Israel.

\* Corresponding author:

[Efrat.shema@weizmann.ac.il](mailto:Efrat.shema@weizmann.ac.il)

<sup>+</sup> Equal contribution

**The analysis of cell-free DNA (cfDNA) in plasma represents a rapidly advancing field in medicine, providing information on pathological processes in the body. Blood cfDNA is in the form of nucleosomes, which maintain their tissue- and cancer-specific epigenetic state. We developed EPINUC, a single-molecule multi-parametric assay to comprehensively profile the Epigenetics of Plasma Isolated Nucleosomes, DNA methylation and cancer-specific protein biomarkers. Our system allows high-resolution detection of six active and repressive histone modifications, their ratios and combinatorial patterns, on millions of individual nucleosomes by single-molecule imaging. In addition, it provides sensitive and quantitative data on plasma proteins, including detection of non-secreted tumor-specific proteins such as mutant p53. Applying this analysis to a cohort of plasma samples detected colorectal cancer at high accuracy and sensitivity, even at early stages. Finally, combining EPINUC with direct single-molecule DNA sequencing revealed the tissue-of-origin of the tumor. EPINUC provides multi-layered clinical-relevant information from limited liquid biopsy material, establishing a novel approach for cancer diagnostics.**

30 Non-invasive liquid biopsy methods, based on the analysis of cfDNA, potentiate a new generation  
31 of diagnostic approaches. The cfDNA that circulates in the plasma and serum of healthy  
32 individuals originates predominantly from death of normal blood cells<sup>1</sup>. In cancer patients,  
33 however, a fraction of cfDNA is tumor-derived, termed circulating tumor DNA (ctDNA). ctDNA-  
34 based sequence analysis has been shown to reveal tumor-specific genetic alterations and provide  
35 the means for non-invasive molecular profiling of tumors<sup>2,3</sup>. Despite encouraging data, these  
36 approaches are limited, as they require genetic differences (i.e. mutations) in order to distinguish  
37 between the normal and tumor DNA. Liquid biopsy approaches based on analysis of non-genetic  
38 features have emerged recently, most prominently methodologies that utilize tissue- and cancer-  
39 specific DNA methylation, as well as differential fragmentation patterns of cfDNA<sup>4,5,6,7,8</sup>.

40 cfDNA in the plasma appears predominantly in the form of nucleosomes (cfNucleosomes), the  
41 basic unit of chromatin that consists of ~150 base pairs of DNA wrapped around the octamer of  
42 core histone proteins. Histones are extensively modified by covalent attachment of various  
43 chemical groups, forming combinatorial epigenetic patterns that are unique to each tissue, and  
44 provide information on gene expression and regulatory elements within cells<sup>9,10,11,12</sup>. There is  
45 evidence that cfNucleosomes retain at least some of their epigenetic modifications, and a recent  
46 study applied Chromatin Immunoprecipitation and sequencing (ChIP-seq) to identify certain  
47 marks<sup>13,14,15</sup>. Moreover, deep sequencing of cfDNA revealed nucleosome occupancy patterns  
48 correlating with the tissue of origin<sup>16,17,18</sup>. While these approaches provide the first glimpse into  
49 the rich epigenetic information present in plasma that has so far remained mostly inaccessible, they  
50 have major limitations. Mainly, they require large amounts of input material, have a limited  
51 dynamic range (ChIP-seq), or are costly and require deep sequencing. Most importantly, these  
52 methodologies have limited output and sensitivity, as they usually measure a single layer of  
53 information (i.e. DNA methylation OR a single histone modification OR nucleosome occupancy,  
54 etc.). Thus, high-resolution approaches that integrate information from multiple parameters  
55 spanning different types of analytes are required.

56 Colorectal Cancer (CRC) is the third most common cancer worldwide, causing approximately  
57 700,000 deaths every year<sup>19</sup>. Early metastatic seeding has been recently demonstrated in CRC<sup>20</sup>,  
58 underlining the necessity to develop better diagnostic tools to improve patient outcome. In this  
59 study, we developed a single-molecule-based liquid biopsy approach, to analyze multiple  
60 parameters from less than 1 ml of plasma sample and demonstrated its value for CRC diagnosis.  
61 We coined the technology “EPINUC” for Epigenetics of Plasma Isolated Nucleosomes (Fig. 1a).

62 The technology builds on our recent development of a single-molecule system to image  
63 combinatorial histone modifications by Total Internal Reflection (TIRF) microscopy<sup>21</sup>. To capture  
64 nucleosomes from plasma, we developed high-efficiency enzymatic reactions to fluorescently tag  
65 and polyadenylate nucleosomes (Supplementary Fig.1a,b,c,d,e, Methods). Tailed, intact  
66 nucleosomes were then immobilized on a PEGylated surface via hybridization, and the status of  
67 their post-translational modifications (PTMs) was recorded by TIRF imaging with fluorescently  
68 tagged antibodies (Fig. 1b and Supplementary Fig. 1f). Binding and dissociation of antibodies to  
69 target PTMs was imaged over 90 minutes, leveraging the TIRF narrow excitation range (~100  
70 nm). Integration of binding events assured maximal detection of modified histones (Fig. 1c and  
71 Supplementary Fig. 2a).

72 EPINUC relies on direct counting of single-molecules in a population, yielding data amenable to  
73 absolute quantification and comparisons between samples. Each antibody was verified for  
74 specificity and linearity of binding with a panel of recombinant modified nucleosomes, yielding  
75 six antibodies that passed the quality control criteria (Supplementary Fig. 2b,c,d). These antibodies  
76 target the tri-methylations on histone H3 lysine 9 (H3K9me3) and lysine 27 (H3K27me3),  
77 associated with gene silencing and heterochromatin, as well as antibodies targeting marks  
78 associated with active transcription: tri-methylation of histone H3 on lysine 4 (H3K4me3) and  
79 lysine 36 (H3K36me3), and acetylation on lysine 9 (H3K9ac). In addition, our panel includes an  
80 antibody targeting mono-methylation of histone H3 on lysine 4 (H3K4me1), a mark associated  
81 with enhancers<sup>22,23</sup>.

82 Nucleosomes from each plasma sample were tagged with Cy3 (green), and imaged with three  
83 pairwise combinations of antibodies labeled with AF488 (cyan) or AF647 (red). Thus, we obtained  
84 multi-parametric data for six histone PTMs, comprising of the percentage of modified  
85 nucleosomes in each sample, the ratio between various histone modifications, and the percentage  
86 of nucleosomes that harbor a combinatorial pattern of two modifications (Fig. 1d,e,f). To the best  
87 of our knowledge, EPINUC is the only technology that enables counting of multiple histone PTMs,  
88 as well as combinatorially-modified nucleosomes, at a single-molecule precision, from low  
89 volume plasma sample (<1ml).

90 To extend the number of analytes measured beyond histone PTMs, we exploited the single-  
91 molecule system for quantification of protein biomarkers. We modulated surface chemistry to  
92 contain PEG-streptavidin, allowing anchoring of biotin-conjugated antibodies that target plasma

93 proteins. Following incubation with plasma, bound proteins are imaged by fluorescent detection  
94 antibodies. Multiplexed simultaneous detection of three biomarkers is achieved through the use of  
95 distinct fluorophores (Fig. 2a). We imaged two proteins known to increase in plasma of CRC  
96 patients: Carcinoembryonic antigen (CEA), a canonical biomarker measured routinely by  
97 clinicians<sup>24</sup>, and Tissue inhibitor of metalloproteinase-1 (TIMP-1), a glycoprotein reported to have  
98 diagnostic value in screening for CRC<sup>25</sup>. In addition, we measured the mammalian sterile 20-like  
99 kinase 1 (MST1), an inhibitor of cell proliferation that decreases in CRC patients<sup>26</sup> (Fig. 2b). We  
100 verified linear detection and specificity using cell-culture systems and knockdown experiments  
101 (Fig. 2c,d and Supplementary Fig. 3).

102 Counting of single molecules confers high sensitivity<sup>27,28</sup>, thus we explored whether we could also  
103 quantify non-secreted tumor-specific plasma proteins that are undetectable by conventional  
104 technologies. We focused on the tumor suppressor p53, which is frequently mutated in CRC; p53  
105 mutations lead to its stabilization and accumulation in tumor cells<sup>29</sup>. We captured p53 from plasma  
106 and applied simultaneous detection with two distinct antibodies; an antibody targeting both the  
107 wild type and mutant forms of p53, or another antibody specifically targeting the mutant  
108 conformation (Fig. 2e). Time-lapse imaging enabled the accumulation of p53 signal, overcoming  
109 the transient binding dynamics of the detection antibodies (Fig. 2f and Supplementary Fig. 3d).  
110 Indeed, we observed higher levels of total and mutant p53 in the plasma of CRC patients with  
111 confirmed p53 mutations (Fig. 2g), establishing our system's capabilities in specific detection of  
112 mutant proteins that originate directly from tumor cells.

113 DNA methylation is often deregulated in cancer, and specifically in colorectal cancer<sup>30,31</sup>. We  
114 therefore aimed to combine our analysis with quantitative single-molecule detection of DNA  
115 methylation levels in plasma. We incubated Methyl-CpG-binding domain protein 2 (MBD2-  
116 biotin), which specifically binds to methylated DNA<sup>32</sup>, with fluorescently labeled plasma cfDNA.  
117 Bound complexes were anchored to the surface and imaged (Fig. 2h). Specificity and sensitivity  
118 were validated using synthetic methylated/unmethylated DNA, as well as DNA from cells treated  
119 with the DNA methyl transferase (DNMT) inhibitor 5-Aza-2'-deoxycytidine (Fig. 2i and  
120 Supplementary Fig. 4a,b). Finally, we verified detection of cfDNA methylation levels from plasma  
121 of CRC and healthy subjects (Fig. 2j).

122 We applied EPINUC to generate high-dimensional data, comprising of the three layers of  
123 information; histone PTMs, DNA methylation and protein biomarkers, from 33 plasma samples of

124 healthy subjects and 29 samples taken from 23 late stage CRC patients (stages III-IV; six patients  
125 were sampled twice at different times during cancer progression and treatment). CRC samples  
126 were obtained from patients prior to surgery or from patients that underwent surgical resection  
127 procedure and chemotherapy. In accordance with its use in clinical diagnostics<sup>24</sup>, single-molecule  
128 counting of CEA showed higher levels in CRC patients (Fig. 3a and Supplementary Fig. 5a,b), and  
129 a reduction in patients after resection. Interestingly, high CEA levels were also observed in a few  
130 healthy individuals, generating a ‘false positive’ signal (for example, sample 19, marked by \* in  
131 Supplementary Fig. 5a). Simultaneous probing of MST1, an anti-proliferative factor, allowed us  
132 to derive the CEA/MST1 ratio, resulting in better classification of samples and highlighting an  
133 advantage of combinatorial biomarker detection (Fig. 3b,c). Of note, plasma from CRC patients  
134 following resection exhibited altered CEA/MST1 ratio compared to non-resected patients,  
135 showing higher similarity to healthy individuals (Fig. 3a,b). This demonstrates the potential  
136 applicability of our technology to monitor treatment, while underlying the need to collect  
137 additional information from each sample to allow correct sample classification.

138 EPINUC also provides quantitative measurements of the total number of cfNucleosomes, six  
139 histone PTMs, their pairwise combinations and ratios per plasma sample (Fig. 1). In agreement  
140 with the literature, CRC patients had higher cfNucleosomes in their plasma compared to healthy  
141 controls<sup>33</sup> (Supplementary Fig. 5c). While most epigenetic parameters did not change, several  
142 showed significant differences: CRC patients had higher levels of H3K27me<sup>3</sup>-, H3K9me<sup>3</sup>- ,  
143 H3K9ac- and H3K4me<sup>1</sup>-modified nucleosomes, and higher ratio of H3K9ac to H3K4me<sup>1</sup> (Fig.  
144 3d and Supplementary Fig. 5c,d). Interestingly, the combinatorial pattern of  
145 H3K9me<sup>3</sup>+H3K36me<sup>3</sup>-modified nucleosomes decreased in CRC, concomitant with an increase  
146 in ‘bivalent’ nucleosomes marked by H3K4me<sup>3</sup>+H3K27me<sup>3</sup> (Fig. 3d). As bivalent chromatin is  
147 strongly implicated in many types of cancers<sup>21,34</sup>, this result further confirms the diagnostic value  
148 of single-molecule quantification of combinatorial histone marks. DNA methylation was reduced  
149 in CRC samples, in agreement with previous studies<sup>35,36</sup> (Fig. 3e).

150 The identification of epigenetic and biomarkers alterations in late stage CRC motivated us to apply  
151 EPINUC to eight plasma samples from individuals diagnosed with early stage CRC (stage II). As  
152 in the later stage, the levels of DNA methylation, CEA and CEA/MST1 ratio significantly differed  
153 in early stage cancer patients versus healthy (Fig. 3f and Supplementary Fig. 5e). Interestingly,  
154 TIMP1, whose levels did not alter between our cohort of healthy and late stage CRC, was elevated

155 at the early stage (Supplementary Fig. 5e,f). This may reflect the downregulation of TIMP1  
156 following chemotherapy<sup>37</sup>, rendering it a significant biomarker only for early stage. Of note,  
157 plasma from stage II CRC patients also showed elevated levels of H3K27me3- and H3K9me3-  
158 modified nucleosomes, as seen in the late stage (Fig. 3f). Interestingly, we did not observe  
159 increased levels of cfNucleosomes in early stage CRC, likely due to the low tumor burden  
160 (Supplementary Fig. 5e). While the levels of H3K9ac- and H3K4me1-modified nucleosomes did  
161 not differ significantly from the healthy group, the combinatorial pattern of H3K4me1 and H3K9ac  
162 was lower in early CRC patients compared to healthy (Fig. 3f). Finally, we calculated the  
163 predictive score of each parameter alone to discriminate between the healthy and the distinct  
164 groups of CRC patients (Fig. 3g, Methods). These results highlight EPINUC's capabilities in  
165 providing multiplexed single-molecule measurements of protein biomarkers, epigenetic  
166 modifications and their combinations for CRC diagnostics.

167 To visualize the distribution of samples across the most significant and predictive parameters, we  
168 performed Principal Component Analysis (PCA). The PCA showed spatial separation between the  
169 groups, with the early stage CRC samples positioned in between the healthy and the late-stage  
170 CRC, potentially reflecting a transition stage (Fig. 3h). While samples from healthy individuals  
171 formed a tight cluster, the cancer samples showed greater variability, likely due to inherent  
172 heterogeneity between tumors. CRC patients who underwent resection also exhibited a high  
173 heterogeneity; interestingly, patients who received both primary tumor resection and  
174 metastectomy were positioned closer to the healthy group (samples 4118, 4211 and 4050).

175 A few CRC patients in our cohort were sampled twice along the course of the study, allowing us  
176 to examine the projection of samples taken from the same individual in the PCA plot (Fig. 3h,  
177 marked in \*, #, and +). Sample 4090 was collected two months following sample 4075 from a CRC  
178 patient who underwent tumor resection and extensive treatments. Unfortunately, her condition did  
179 not improve and she passed away a month later; indeed the later sample projects further from  
180 healthy on both principle components. A similar trend can be seen for samples 3488 and 4059,  
181 taken 6.5 months apart. These results highlight the potential of EPINUC to monitor patients'  
182 positive or negative response to treatment, and the power of collecting multiple layers of  
183 information from each sample.

184 Finally, in order to integrate all measurements and fine-tune the discrimination between healthy  
185 and CRC samples, we employed machine-learning classification (Fig. 4a, Methods). The best

186 predictive model displayed high diagnostic potential by generating a 0.96 AUC [95% confidence  
187 interval (CI) 0.935 - 0.981], and sensitivity of 88% [95% CI 82.9 – 93.3] at 90% specificity [95%  
188 CI 84 – 94.8] and 91% precision [95% CI 87.1 – 95.3], outperforming predictive models relying  
189 solely on protein biomarkers or DNA methylation coupled with biomarkers (Fig. 4a and  
190 Supplementary Fig. 6a). Intriguingly, this high discrimination power is achieved without including  
191 DNA sequencing. This is mainly due to the combination of multiple parameters spanning various  
192 cellular pathways into a single assay, and the high accuracy of the single-molecule technology that  
193 allows for digital counting of molecules.

194 We hypothesized that introducing a sequencing feature for samples that were classified as  
195 cancerous by the machine-learning algorithm would provide yet another layer of specificity and  
196 sensitivity. As different tissues vary in their epigenetic modifications, it may allow detection of  
197 the tissue-of-origin of the circulating nucleosomes, thus revealing the origin of the cancer. To that  
198 end, we coupled the epigenetic analysis with single-molecule DNA sequencing<sup>21</sup> (Fig. 4b and  
199 Supplementary Fig. 6b). Briefly, following detection of histone PTMs on cfNucleosomes, the  
200 histone proteins are evicted, and the DNA is subjected to repeated cycles of sequencing-by-  
201 synthesis using an automated fluidics system. Each cycle consists of incorporation of A, C, T or  
202 G by DNA polymerase and imaging; following 120 cycles, the data is integrated to build a strand  
203 that can be aligned to the genome, corresponding to the position of the modified nucleosome.

204 As proof-of-concept, we applied EPINUC followed by sequencing (EPINUC-seq) to two plasma  
205 samples of late stage CRC probed for H3K4me3 and H3K27me3 (Fig. 4c,d,e, Supplementary Fig.  
206 6c,d, Methods). Single-molecule mapped reads, corresponding to modified nucleosomes, were  
207 intersected with unique antibody peak signatures generated from ENCODE ChIP-seq data for  
208 various tissues and primary cell lines, followed by bootstrapping simulations to calculate  
209 significance. Reinforcing our hypothesis, we found that both plasma samples showed significant  
210 overlap with colon-specific H3K4me3 and H3K27me3 peaks, indicating colon as the main tissue-  
211 of-origin (Fig. 4d and Supplementary Fig. 6c,d). Validating our approach, a similar analysis of a  
212 plasma sample from lung cancer patient revealed lung tissue as the main origin (Supplementary  
213 Fig. 6e). Moreover, comparing our data to a recent ChIP-seq study of H3K4me3 in plasma showed  
214 significant overlap with profiles obtained from CRC patients<sup>13</sup>, but not with healthy plasma (Fig.  
215 4e). H3K27me3 mapped reads showed a broader pattern, overlapping with peaks corresponding  
216 to hematopoietic lineage as well as colon (Fig. 4d and Supplementary Fig. 6d). Interestingly, we

217 also observed a significant overlap with liver-specific H3K27me3 peaks, in agreement with  
218 clinical analysis indicating this CRC patient (patient 4044) had liver metastasis.

219 Finally, we combined a complementary single-molecule approach to identify the tumor tissue-of-  
220 origin, by single-molecule profiling of the DNA modification 5-Hydroxymethylcytosine (5hmC).  
221 5hmC is known to play important roles in gene regulation and cancer<sup>38,39</sup>. We captured 5hmC-  
222 enriched DNA from plasma as previously described<sup>40</sup>, followed by single-molecule DNA  
223 sequencing (Supplementary Fig. 7a, Methods). In agreement with previous reports<sup>41</sup>, we found  
224 5hmC in cfDNA to be enriched at gene bodies and promoter proximal regions (Supplementary  
225 Fig. 7b), which are also known to be marked with H3K36me3. Thus, we generated unique 5hmC  
226 read signatures for healthy and CRC samples, and examined their overlap with H3K36me3 peak  
227 signatures from various tissues and primary cell lines (Methods). Similar to sequencing of the  
228 histone marks (Fig. 4d), analysis of 5hmC in the plasma of the same patient showed highly  
229 significant overlap with the colon-specific profile, validating this strategy for identification of the  
230 tumor tissue-of-origin (Fig. 4f and Supplementary Fig. 7c). Finally, we showed correct  
231 identification of colon origin also for early stage CRC patients (Fig. 4g and Supplementary Fig.  
232 7d).

233 Our work establishes EPINUC as a novel liquid biopsy approach that analyzes multiple histone  
234 and DNA modifications, as well as protein biomarkers, at single-molecule precision. EPINUC  
235 distinguishes between CRC patients to healthy individuals at high specificity and sensitivity. We  
236 showed that this multi-parametric approach is suitable also for detection of early stage patients,  
237 although expanding the analysis to a larger cohort is needed. The main challenges with analyzing  
238 plasma nucleosomes are (1) their minute amount- in 1 ml of plasma there are ~1000 genome  
239 copies<sup>13,42</sup>; (2) The plasma is highly dense with additional proteins, rendering enzymatic or binding  
240 approaches to capture nucleosomes difficult; (3) There is high variability between different  
241 individuals, stressing the need for quantitative methodologies to allow comparison between  
242 samples; and (4) Multi-parametric data is needed to achieve high specificity and confidence in  
243 detection. Our EPINUC approach addresses these challenges by enabling single-molecule  
244 combinatorial detection of epigenetic marks, DNA sequencing and protein biomarkers from  
245 limited input material. In addition to the unique epigenetic analysis, the single-molecule system  
246 outperforms the classical ELISA assay for measuring protein biomarkers. ELISA is of relatively  
247 low sensitivity and is therefore limited to proteins that are present at high levels, has lower dynamic



248 range in quantifying proteins, and is not amenable to multiplexed detection of several proteins<sup>27,28</sup>.  
249 We showed that the single-molecule system is capable of detecting the mutant form of p53, which  
250 is a non-secreted protein that originates directly from the tumor cells. Importantly, the system is  
251 straightforward to adapt for detection of additional proteins, thus increasing sensitivity and  
252 enabling disease-specific biomarkers analysis.

253 EPINUC is built on the idea that integration of multiple parameters would provide specific  
254 diagnosis, which is independent on DNA sequencing. This would potentially render the EPINUC  
255 approach fast and inexpensive, paving the way to a mass screening method for a variety of cancers.  
256 Nevertheless, further studies are needed to test whether this technology can differentiate between  
257 various cancer types based solely on the epigenetic and biomarker profiles. Such studies may also  
258 provide insights on whether the epigenetic differences detected by EPINUC originate solely from  
259 the tumor cells, or may represent, at least in part, epigenetic alterations occurring in non-cancer  
260 cells. Importantly, we showed that the combination of EPINUC with single-molecule DNA  
261 sequencing provides unequivocal evidence of the tumor tissue-of-origin, thus further elucidating  
262 the type of cancer of each individual. This technology greatly expands the already burgeoning field  
263 of liquid biopsies and has the potential to be applicable for early detection of cancer and  
264 monitoring.

265  
266 **Acknowledgments:** We thank Dr. R. Rozenzweig, Dr. O. Fasust, Mr. M. Maurer, and Ms. R.  
267 Irwin for their contribution in establishing a protocol for Methyl-CpG-binding domain protein 2  
268 labeling. We are grateful for the important comments made by I. Ulitsky while reading the  
269 manuscript.

270 **Funding:** E.S. is an incumbent of the Lisa and Jeffrey Aronin Family Career Development chair.  
271 This research was supported by grants from the European Research Council (ERC801655,  
272 ERC\_PoC\_963863), The Israeli Science Foundation (1881/19), The German-Israeli Foundation  
273 for Scientific Research and Development and Minerva.

274 **Author contributions:** V.F, N.E, and E.S designed the study and wrote the manuscript. V.F and  
275 N.E performed the experiments and analyzed the data. N.F and O.B assisted in the experiments,  
276 G.R assisted with data analysis. B.B.Z, Y.M, T.P, A.H, J.E.C, A.S, M.T, A.G, M.M and A.Z  
277 collected the plasma samples of early and late stage CRC patients. D.J, A.S, K.A contributed to

278 the development of single-nucleosomes imaging technology and sequencing experiments  
279 described in this study.

280 **Competing interests:** Authors declare that they have no competing interests.

281 **Data and materials availability:** All data is available in the main text or the supplementary  
282 materials.

283

284

285

286

287

288

289

290

291

292

293

294

295

296

297

298

299

300

301

302

303

304

305

306

307

308

309

## 310 **Methods**

311

### 312 Patients

313 All clinical studies were approved by the local ethics committees (Helsinki applications 091-2020  
314 and 0198-14-HMO). Informed consent was obtained from all individuals before blood sampling.

### 315 Plasma collection

316 Blood samples were collected in VACUETTE K3 EDTA tubes and transferred immediately to ice.  
317 Next, blood was centrifuged (10 minutes, 1,500g, 4°C) and the supernatant was transferred to a  
318 fresh 50-ml tubes and centrifuged again (10 minutes, 3,000g, 4°C). The supernatant was collected  
319 and used as plasma for all experiments. Plasma was analyzed fresh or flash-frozen and stored at  
320 -80°C for future analysis.

### 321 Cell-free nucleosomes (cfNucleosomes) preparation for single-molecule imaging

322 Tagging and tailing of cfNucleosomes was carried out as following: 20 µl of plasma or 5X (DDW  
323 diluted) concentrated apoptotic medium was incubated at 37°C for 1 hour with the following  
324 reaction mixture: 10 µl 10X Green Buffer (Enzymatics, B0120), 416 µM CoCl<sub>2</sub> (Enzymatics,  
325 B0220), 1:60 PI (SIGMA, P8340), 83.3 nM fluorescently labeled dATP (Jena Bioscience, NU-  
326 1611-Cy3/Cy5), 83.3 µM dATP (Thermo Fisher Scientific, R0181), 5 µl of Klenow Fragment  
327 (3'→5' exo-, NEB, M0212S) 3µl of T4 Polynucleotide Kinase (NEB, M0201L) and 4 µl of  
328 Terminal deoxynucleotidyl transferase (TdT, Enzymatics, P7070L). Following incubation,  
329 samples were inactivated by immediate transfer to ice. For nucleosome sequencing, 1.67 µl of  
330 ddATP was added (SIGMA, GE27-2051-01).

### 331 Plasma cell-free DNA (cfDNA) isolation and fluorescent labeling

332 cfDNA was extracted from 4 ml of healthy human blood plasma, or from 0.5 ml of plasma from  
333 CRC patients, using the Mag-Bind cfDNA Kit (Omega Bio-Tek, M3298-01). For optimized yield,  
334 protocol was modified by increasing elution time to 20 minutes on a thermomixer, at 1,600 rpm,  
335 in 15 µl elution buffer at room temperature. Sample concentration was measured using Qubit  
336 Fluorometer (Thermo Fisher Scientific). For fluorescent labeling of plasma isolated DNA, 10 µl  
337 of cfDNA was incubated at 37°C for 1 hour with the following reaction mixture: NEBuffer™ 2  
338 (NEB, B7202), 0.25 mM MnCl<sub>2</sub> (SIGMA, M1787), 33 µM fluorescently labeled dATP (Jena  
339 Bioscience, NU-1611-Cy3), 1.5 µl of Klenow Fragment (3'→5' exo-, NEB, M0212S) and 1.5 µl  
340 of T4 Polynucleotide Kinase (NEB, M0201L). Following incubation, samples were inactivated by  
341 addition of EDTA (Invitrogen, 15575-038) at a final concentration of 20mM. Next, DNA was

342 purified by AMPure SPRI beads (Beckman Coulter, A63881), and quantified by Qubit (Thermo  
343 Fisher Scientific).

#### 344 Cell culture and apoptosis

345 Cell lines were maintained at 37°C with 5% CO<sub>2</sub>. HEK-293 cells were cultured in 150 cm plates  
346 (10×10<sup>6</sup> cells in 20 ml of media) in DMEM supplemented with 10% FBS and 1% P/S, and  
347 passaged every week. For induction of apoptosis, 6 μM of Staurosporine (STS, Holland-Moran,  
348 62996-74-1.25) was added to medium of confluent cells. 72 hours later, medium was collected and  
349 immediately processed. To verify fragment sizes along with nucleosome labeling, 10 ul of the  
350 nucleosomes and 10ul of AMPure extracted DNA (either directly from concentrated medium or  
351 after the tagging and tailing reaction), were loaded on High Sensitivity D1000 ScreenTapes  
352 (Agilent, 5067-5584) and 6% TBE gel (ThermoFisher Scientific, EC62655BOX), and imaged with  
353 4200 TapeStation (Agilent) or Typhoon imager (Amersham Biosciences), respectively. Apoptotic  
354 medium cfNucleosomes were concentrated and recovered using Centricon Plus-70 centrifugation  
355 filteres (Merck, UFC710008) according to the manufacture protocol. PI was supplemented 1:100  
356 following concentration.

#### 357 Surface preparation for single-molecule imaging

358 PEGylated-Biotin and PEGylated-poly T coated microscope slides were prepared based on the  
359 protocol described by Chandradoss et al<sup>43</sup>. Ibidi glass coverslips (25 mm x 75 mm, IBIDI, IBD-  
360 10812) were cleaned with (1) MilliQ H<sub>2</sub>O (3X washes, 5 minutes sonication, 3X washes); (2) 2%  
361 Alconox (SIGMA, 242985) (20 min sonication followed by 5X washes with MilliQ H<sub>2</sub>O); and (3)  
362 100% Acetone (20 min sonication followed by 3X washes with MilliQ H<sub>2</sub>O). Slides were further  
363 cleaned and functionalized (Hydroxylated) by incubation in 1 M KOH (SIGMA, 484016) solution  
364 for 20 minutes while sonicated, followed by 3X washes with MilliQ H<sub>2</sub>O. Slides were sonicated  
365 twice for 10 minutes in 100% HPLC ethanol (J.T baker 8462-25) prior to applying amino-  
366 silanization chemistry. Next, slides were incubated for 24 minutes in a mixture of 3% 3-  
367 Aminopropyltriethoxysilane (ACROS Organics, 430941000) and 5% acetic acid in HPLC EtOH,  
368 with 1 minute sonication in the middle. Slides were then washed with HPLC EtOH (3X) and  
369 MilliQ H<sub>2</sub>O (3X) and dried with N<sub>2</sub>. Surface functionalization along with first passivation step  
370 was performed by applying mPEG: PEGylated-Biotin/PEG-Azide solution [20 mg PEGylated-  
371 Biotin (Laysan, Biotin-PEG-SVA-5000), 180 mg mPEG (Laysan, MPEG-SVA-5000) or 20 mg  
372 PEG-Azide (JenKem, A5088), 180 mg mPEG (Laysan, MPEG-SVA-5000)] dissolved in 1560 ul  
373 0.1 M Sodium Bicarbonate (SIGMA, S6297) and degassed (centrifugation at 1 minute at 16,000g).

374 Next, 140  $\mu$ l of solution was applied on one surface, followed by immediate assembly of another  
375 surface on top. Each pair of assembled surfaces were incubated overnight in a dark humid  
376 environment.

377 For PEGylated-Biotin surfaces: At the next day, surfaces were washed with MilliQ H<sub>2</sub>O and dried  
378 with N<sub>2</sub> followed by a second passivation step. MS(PEG)<sub>4</sub> (ThermoFisher Scientific, TS-22341)  
379 was diluted in 0.1 M of sodium bicarbonate to a final concentration of 11.7 mg/ml and applied on  
380 one surface, followed by the assembly of another surface on top. Each pair of assembled surfaces  
381 were incubated overnight in dark humid environment. The next day, surfaces were disassembled,  
382 washed with MilliQ H<sub>2</sub>O and dried with nitrogen. After nitrogen flush, surfaces were stored in -  
383 20°C.

384 For PEGylated-poly T surfaces, following PEG-Azide coating, surfaces were washed with MilliQ  
385 H<sub>2</sub>O and dried with N<sub>2</sub>. To enable anchoring of dT50 to surface via click chemistry, 10  $\mu$ M of  
386 5'hexynyl-dT50 (IDT) were mixed with 2 mM of CuSO<sub>4</sub> (SIGMA, C1297) and DDW. Next, 100  
387  $\mu$ l of the mixture was applied on one surface, followed by immediate assembly of another surface  
388 on top. Each pair of assembled surfaces was incubated overnight in a dark humid environment. In  
389 the next day, a second passivation step [MS(PEG)<sub>4</sub>] was carried out, similarly to PEGylated-Biotin  
390 preparation. Surfaces were stored in -20°C post nitrogen flush in a similar fashion.

### 391 Antibody labeling

392 Capture and detection antibodies were labeled using Biotin conjugation kit (Abcam, ab201796)  
393 and Alexa flour antibody labeling kits (Thermo Fisher Scientific, A20181/ A10237/A20186)  
394 according to the manufacture protocol. Labeled antibodies were purified by size exclusion  
395 chromatography using Bio-Spin 6 columns (Bio-Rad, 7326200) followed by measurement of  
396 protein concentration using *Nanodrop* 2000 at 260 nm.

### 397 TIMP-1 imaging and siRNA transfections

398 siRNA transfection was performed using INTERFERin (Polyplus, 409-10) according to the  
399 manufacturer's protocol. Briefly, cells were plated in 6-well plates ( $1.5 \times 10^5$  in 2.5 ml per well)  
400 overnight, and the 200  $\mu$ l of transfection complex was added directly to medium, at final  
401 concentration of 25 nM of siRNA. RNA and protein samples were isolated from cells 72 hours  
402 after transfection. The following siRNA was used: SMARTpool: ON-TARGETplus Human  
403 TIMP1 siRNA (L-011792-00-0005, Dharmacon). For single-molecule imaging, medium was  
404 collected from plates, followed by centrifugation at max speed in 4°C and collection of supernatant  
405 to separate proteins from cell debris. Protein concentration was determined by Pierce™ BCA

406 Protein Assay (Thermo Fisher Scientific, 23225), followed by addition (1:100) of protease  
407 inhibitor cocktail (PI, SIGMA, P8340).

#### 408 Synthetic DNA preparation for DNA methylation assay

409 DNA fragments were generated by conventional PCR (primer sites underlined) supplementing the  
410 reaction with either methylated (NEB, N0356S) or un-methylated cytosine (Thermo Fisher  
411 Scientific, R0181), followed by purification with AMPure SPRI beads. The size (~200 bp) was  
412 chosen to mimic the size of mono-nucleosomal DNA fragments previously identified in blood  
413 plasma<sup>44</sup>. Fragment labeling, purification and quantification was performed as described for  
414 plasma cfDNA.

415 Sequence:

416 CATCAATGTATCTTATCATGTCTGTATACCGTCGACCTCTAGCTAGAGCTTGGCGTAA  
417 TCATGGTCATAGCTGTTTCCTGTGTGAAATTGTTATCCGCTCACAATTCCACACAACA  
418 TACGAGCCGGAAGCATAAAGTGTAAGCCTGGGGTGCCTAATGAGTGAGCTAACTC  
419 ACA

#### 420 5-Aza-2-Deoxycytidine Treatment

421 HEK-293 cells were plated in 150 cm plates ( $10 \times 10^6$  cells in 20 ml of media) overnight, then  
422 treated with 1  $\mu$ M of 5-Aza-2-deoxycytidine (5 -Aza, SIGMA, A3656) or PBS for 4 days. Next,  
423  $5 \times 10^6$  cells were collected and washed with PBS supplemented with PI (1:100), followed by  
424 centrifugation at 3000 rpm for 3 minutes. Cell pellet was resuspended with 1 ml of 0.05% Igepal  
425 (SIGMA, I8896) diluted in PBS (supplemented with PI as mentioned above) and centrifuged again  
426 at 3000 rpm for 3 minutes. Next, the pellet was resuspended in Lysis buffer [100 mM Tris-HCl  
427 pH 7.5 (Gibco, 115567-027), 300 mM NaCl (J.T Baker, 7647145), 2% Triton® X-100 (SIGMA,  
428 9002 93-1), 0.2% sodium deoxycholate (SIGMA, D6750), 10 mM CaCl<sub>2</sub> (SIGMA, 21115)]  
429 supplemented with PI and Micrococcal Nuclease (ThermoFisher Scientific, 88216). The reaction  
430 mixture was incubated at 37°C for 10 minutes and then inactivated by addition of EGTA at a final  
431 concentration of 20mM. Then, lysate was centrifuged for 10 minutes at max speed and supernatant  
432 was transferred to a new tube. DNA extraction, fluorescent labeling and quantification was  
433 performed as described for plasma cfDNA.

#### 434 Single-molecule imaging

435 PEGylated-Biotin and PEGylated-poly T coated coverslips were assembled into an Ibidi flowcell  
436 (Sticky Slide VI hydrophobic, IBIDI, IBD-80608) generating a six lane flowcell, which enables

437 imaging of six different samples or various combinations of antibodies on a single surface. For  
438 PEGylated-Biotin flowcells, Streptavidin (SIGMA, S4762) was added to a final concentration of  
439 0.2 mg/ml followed by 10 minutes incubation and washing with imaging buffer [IMB: 12 mM  
440 HEPES pH 8 (Thermo Fisher Scientific, 15630056), 40 mM TRIS pH 7.5 (Gibco, 115567-027)  
441 60 mM KCL (SIGMA, 60142), 0.32 mM EDTA (Invitrogen, 15575-038), 3 mM MgCl<sub>2</sub> (SIGMA,  
442 63069), 10% glycerol (Bio-Lab, 56815) , 0.1 mg/ml BSA (SIGMA, A7906) and 0.02% Igepal  
443 (SIGMA, I8896)]. For time-lapse imaging experiments (Histone PTMs, p53), prior to sample  
444 application, TetraSpeck beads (ThermoFisher Scientific, T7279) diluted in PBS were added and  
445 incubated on surface for at least 10 minutes to allow correction for stage drift in image analysis.  
446 Imaging was performed on a total internal reflection (TIRF) microscope, Nikon (Ti2 LU-N4  
447 TIRF).

#### 448 **Histone PTMs analysis**

449 PEGylated-poly T coated coverslips were assembled as described and further passivated with 5%  
450 BSA (Merck, A7906) for 30 minutes followed by wash with IMB. Next, plasma sample containing  
451 tailed and fluorescently labeled cfNucleosomes was incubated with antibodies (diluted 1:60) for  
452 30 minutes at room temperature (RT), to allow formation of antibody-cfNucleosomes complexes.  
453 Next, samples were loaded on the surface and incubated for 15 minutes to allow hybridization.  
454 Flowcell was washed (X3) with IMB, followed by time lapse imaging every 15 minutes, with the  
455 three laser channels, across all positions (50 Fields of View (FOVs, 148μm<sup>2</sup>) per experiment).

#### 456 **Protein biomarkers analysis**

457 PEGylated-Biotin coated coverslips were assembled and coated with streptavidin. Biotinylated  
458 antibodies were incubated on surface in IMB2 [10 mM MES pH 6.5 (Boston Bioproducts Inc,  
459 NC9904354), 60 mM KCL, 0.32 mM EDTA, 3 mM MgCl<sub>2</sub>, 10% glycerol, 0.1 mg/ml BSA and  
460 0.02% Igepal] for 30 minutes, followed by wash with IMB2. Next, plasma sample was added to  
461 flowcell and incubated on surface for 30 minutes, followed by washes (3X) with IMB2, to allow  
462 binding of target proteins. Fluorescently labeled antibodies (detection antibodies) were introduced  
463 to the surface for 60 minutes, washed with IMB2, and imaged.

#### 464 **Global DNA methylation analysis**

465 PEGylated-Biotin coated coverslips were assembled and coated with streptavidin. 2 μl of MBD2-  
466 Biotin (Thermo Fisher Scientific, A11148) was incubated with 8 μl of Cy3 labeled cfDNA  
467 fragments for 30 minutes, to allow MBD2-Biotin binding to methylated DNA. Next, the reaction  
468 mixture was immobilized on the surface and incubated for 10 minutes, followed by TIRF imaging.

469 **DNA Hydroxymethylation analysis**

470 cfDNA was incubated in 25 µl reaction mixture containing 50 mM HEPES buffer (pH 8), 25 mM  
471 MgCl<sub>2</sub>, 60 µM UDP-6-N<sub>3</sub>-Glc (Jena Bioscience, CLK-076Motif) and 12.5 U T4 beta-  
472 glucosyltransferase (Thermo Fisher Scientific, EO0831) for 2 hours at 37°C. Next, 5 µl DBCO-S-  
473 S-biotin (Click Chemistry Tools, 10 mM stock in DMSO) was directly added to the reaction  
474 mixture and incubated overnight at 37°C. DNA was cleaned using Oligo Clean & Concentrator  
475 (Zymo, D4060), and immobilized on a PEGylated-Biotin streptavidin coated surface, followed by  
476 imaging.

477 Single-molecule DNA sequencing

478 For single-molecule DNA sequencing of cfNucleosomes, PEGylated-poly T surface was blocked  
479 with BSA as described above. Poly-A tailed FluoSpheres (described below) along with TetraSpeck  
480 beads and cfNucleosomes were applied to surface. PTMs of plasma cfNucleosomes were imaged  
481 over time for 169 FOV, as described above. Then flowcell was washed with Wash A buffer [150  
482 mM HEPES (KOH, pH 7.0), 1×SSC, 0.1% SDS] and Wash B buffer [150 mM HEPES (KOH, pH  
483 7.0), 150 mM NaCl] to evict histones and antibodies, and temperature was increased to 37°C.  
484 Sequencing was performed as described previously, using Helicos True Single Molecule  
485 Sequencing (<http://seqll.com/>)<sup>21,45</sup>. FluoSpheres preparation: FluoSpheres (Carboxylate-Modified  
486 Microspheres, Thermo Fisher Scientific, F8789) were conjugated to dA50-amine (IDT), tailed as  
487 previously described, and hybridized to the surface to serve as reference points for stage drift  
488 correction during alignment of sequencing images.

489 Single-Molecule Hydroxymethylation sequencing

490 2.5 ng of plasma cfDNA was added to a 25 µl solution containing 50 mM HEPES buffer (pH 8),  
491 25 mM MgCl<sub>2</sub>, 60 µM UDP-6-N<sub>3</sub>-Glc (Jena Bioscience, CLK-076) and 12.5 U T4 beta-  
492 glucosyltransferase (Thermo Fisher Scientific, EO0831), and incubated for 2 hours at 37°C. Next,  
493 5 µl DBCO-S-S-biotin (Click Chemistry Tools, 10 mM stock in DMSO) was directly added to the  
494 reaction mixture and incubated overnight at 37°C. For 5hmC DNA pulldown, samples were  
495 incubated at RT with 15 µl of Streptavidin beads (Thermo Fisher Scientific, Dy-11205D) for 1  
496 hour, followed by 3 washes with 1X wash buffer, and elution in 20 µl of 125 mM TCEP (Thermo  
497 Fisher Scientific, TS-77720). 5hmC eluted DNA was poly-adenylated and sequenced on a  
498 PEGylated-poly T surface as described above. Metagene profile was generated using ngs.plot.

499 Image analysis



500 Image analysis was performed with the open-source software Cell Profiler  
501 (<http://www.cellprofiler.org/>). Image analysis pipelines are available upon request. Briefly, time-  
502 lapse images of antibody binding events and TetraSpeck beads are aligned, stacked and summed  
503 to one image. Antibody spots can be differentiated from TetraSpeck beads spots based on spot size  
504 and intensity. Summed antibodies images are aligned with cfNucleosomes images to count  
505 colocalization events.

#### 506 Predictive Power Score (PPS)

507 PPS analysis on the data was conducted using a previously published algorithm  
508 (<https://github.com/8080labs/ppscore>). Briefly, by calculating a cross-validated decisions tree for  
509 the target variable (e.g., diagnosis) using only one of the markers, it is possible to determine which  
510 of the markers in the datasets contributes most to the target variable. The PPS is normalized to the  
511 most common assignment in order to provide a baseline for comparison. Using the PPS rather than  
512 a simple correlation measure allows us to account for non-linear effects and provides an alternative  
513 formulation for correlation which also treats categorical variables (e.g., diagnosis, or disease state  
514 – see **Supplementary Table 3**).

#### 515 Machine learning model for sample classification

516 For sample binary classification, various machine-learning algorithms were trained on the features  
517 that showed significant differences between healthy and CRC (Fig. 3c,d,e, Supplementary Fig.  
518 5b,c), and evaluated for their performance using a four-fold cross-validation across all samples.  
519 The best predictive performance was achieved by a Logistic Regression classifier. To improve  
520 classifier performance, we conducted additional feature selection by training the classifier on all  
521 possible feature combinations out of the significant features aforementioned. Evaluating the  
522 resulting Area Under the Curve (AUC) values of repeated (500 iterations) four-fold cross-  
523 validation for each combination revealed an optimal cumulative performance of a five feature  
524 combination: H3K27me3/Nuc, H3K9me3/Nuc, CEA/MST1, H3K27me3+Nuc (% of  
525 cfNucleosomes harboring H3K27me3) and global DNA methylation. To evaluate the classifier  
526 overall performance using the selected features, we performed repeated (10K) 4-fold cross-  
527 validation across all samples. For each iteration the sensitivity, specificity, accuracy, precision and  
528 the AUC value were calculated and averaged over all iterations. R caret and Rweka packages were  
529 used for machine-learning modeling.

#### 530 Tissue and plasma signatures

531 We downloaded and combined two independent *Homo sapiens* based ChIP-seq tracks for each  
532 tissue from the Encyclopedia of DNA Elements (ENCODE, **Supplementary Table 4**). To  
533 generate a unique antibody peak profile for a given tissue, we discarded reads found to overlap  
534 with at least one of the other seven tissues tested, retaining only tissue specific peaks. Of note,  
535 brain H3K36me3 peaks were available only for embryonic tissue, therefore were replaced with  
536 spleen tissue H3K36me3 peaks. To generate unique plasma H3K4me3 ChIP-seq peaks, we  
537 obtained data from healthy (H) and CRC (C) plasma (n=3 for each) produced by Sadeh et. al.<sup>13</sup>  
538 (**Supplementary Table 4**). For each group, reads were intersected and only shared reads across  
539 all samples were kept for further analysis. Non-overlapping reads between the overlapping healthy  
540 and overlapping CRC reads were defined as the unique plasma signature.

541 Bootstrapping simulation to analyze single-molecule reads overlap with various tissues Overlap  
542 significance was assessed as following: First, single-molecule sequenced plasma antibody aligned  
543 reads were extended by 100bp from each side to resemble nucleosome length. Then, for each  
544 chromosome, we randomly selected a number of 230bp-long DNA segments that is equivalent to  
545 the number of antibody positive plasma reads for this chromosome. Random reads were intersected  
546 with each unique tissue/plasma signature and overlapping events were recorded. These  
547 bootstrapping simulations were iterated 10K times for each tissue for a given antibody to generate  
548 a distribution of overlap by chance. Finally, single-molecule sequenced plasma antibody reads  
549 were intersected with all tissue signatures, and contrasted against the corresponding distribution  
550 of random overlap for that tissue to evaluate overlap significance (two tailed z-test or Wilcoxon  
551 rank sum test). Signature and overlap analysis was performed using an in-house R script (EPINUC-  
552 overlap), where minimal overlap was defined as 1bp overlap. The accession numbers for the  
553 ENCODE chip-seq datasets are summarized in **Supplementary Table 4**.

#### 554 Statistical analysis

555 All the statistical analysis was conducted using the statistical programming language R. Multiple  
556 comparison (Supplementary Fig. 5d) was calculated for cfNucleosomes, DNA methylation and all  
557 other significant parameters via One-way ANOVA, Pairwise comparisons using Wilcoxon rank  
558 sum test with continuity correction and Asymptotic K-Sample Brown-Mood Median Test,  
559 respectively.

#### 560 Data availability

561 Datasets generated and analyzed during this study are summarized in **Supplementary Table 4**,  
562 BED files of plasma sequenced reads are available upon request.

563 Code availability

564 R code for performing overlap analysis is available at [https://github.com/Vadim-Fed/EPINUC-](https://github.com/Vadim-Fed/EPINUC-overlap)  
565 [overlap](https://github.com/Vadim-Fed/EPINUC-overlap).

566

567

568

569

570

571

572

573

574

575

576

577

578

**a**

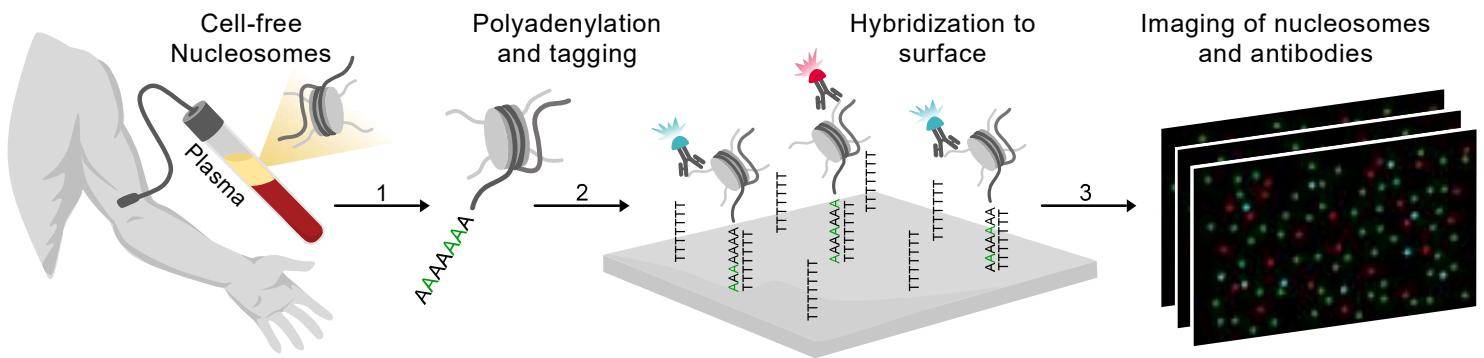

**b**

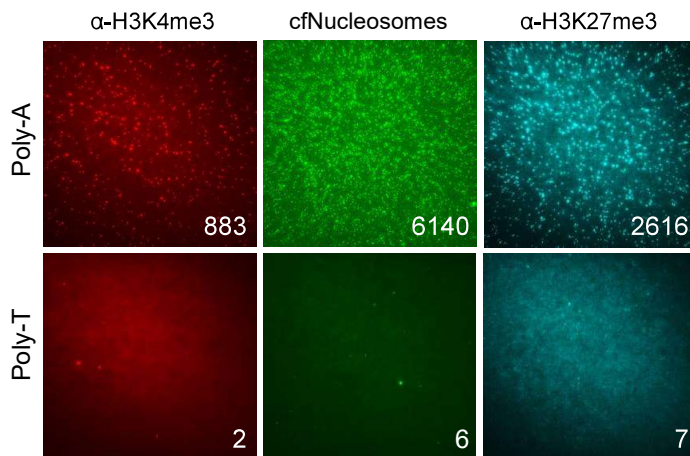

**c**

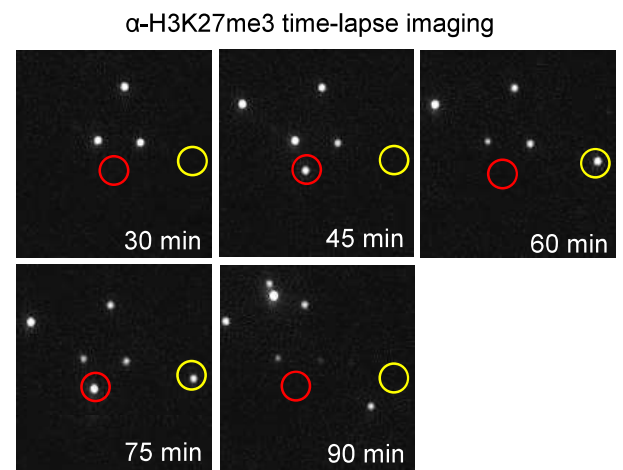

**d**

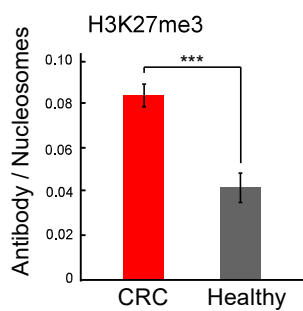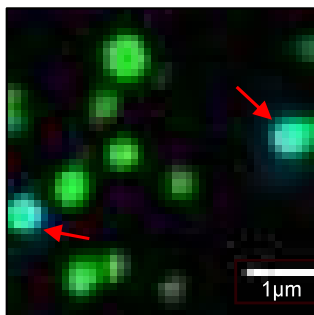

**e**

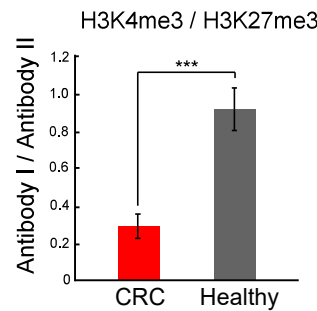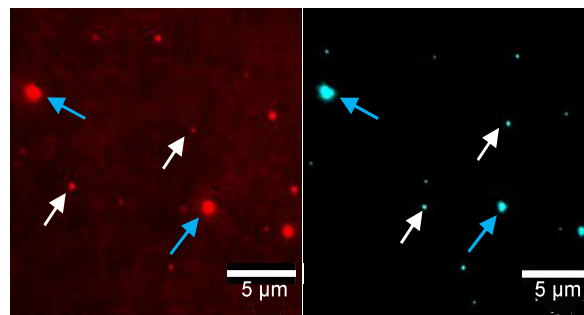

**f**

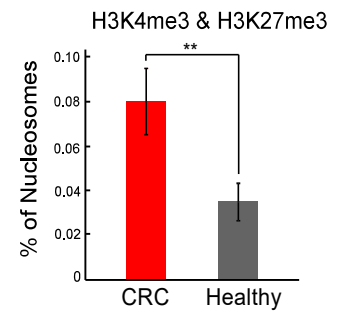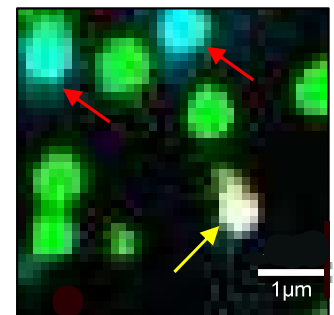

579 **Fig.1: EPINUC decodes the combinatorial epigenetic states of plasma cell-free nucleosomes.**  
580 **a**, Experimental scheme: (1) Sample preparation procedure of cfNucleosomes is carried out in one-  
581 step and consists of two enzymatic processes: repair of DNA ends by Klenow polymerase, and  
582 addition of a poly A tail by Terminal Transferase (TdT). The reaction contains a mixture of natural  
583 dATPs and fluorescently labeled dATPs (Cy3-dATP) to label nucleosomes. (2) cfNucleosomes are  
584 captured on a PEGylated-poly T surface via dA:dT hybridization. Immobilized nucleosomes are  
585 incubated with fluorescently labeled antibodies targeting different histone modifications. (3) TIRF  
586 microscopy is applied to record nucleosome positions and generate time-lapse imaging of  
587 antibodies' binding events. **b**, Representative images of plasma-derived cfNucleosomes and the  
588 corresponding H3K4me3 and H3K27me3 signal (numbers within images represent counted spots).  
589 Each spot corresponds to a single nucleosome. Nucleosomes anchor to the surface specifically via  
590 hybridization, as evident from the lack of signal when tailed with dTTP (Poly-dT) rather than  
591 dATP (Poly-dA). **c**, Representative images of antibodies' binding and dissociation events over  
592 time from individual target molecules (marked by red/yellow circles). **d,e,f** Example for  
593 quantification and representative images of the various parameters measured by EPINUC in  
594 plasma samples from a healthy subject and a CRC patient. Zoomed-in image segments of entire  
595 field of view ( $148\mu\text{m}^2$ ). **d**, The percentage of cfNucleosomes (green spots, Cy3) that are modified  
596 by H3K27me3 (cyan spots, AF488). Red arrows indicate co-localization events. Scale bar =  $1\mu\text{m}$   
597 **e**, Ratio between H3K4me3 (red, AF647) and H3K27me3 (cyan) antibodies. White arrows indicate  
598 antibody spots, blue arrows indicate TetraSpeck beads that are used for alignment. Scale bar =  
599  $5\mu\text{m}$ . **f**, cfNucleosomes marked by the combinatorial pattern of both H3K27me3 and H3K4me3.  
600 Red arrows indicate co-localization events of H3K27me3 only, yellow arrow indicates a  
601 combinatorially modified nucleosome. Scale bar =  $1\mu\text{m}$ .

602

603

604

605

606

607

608

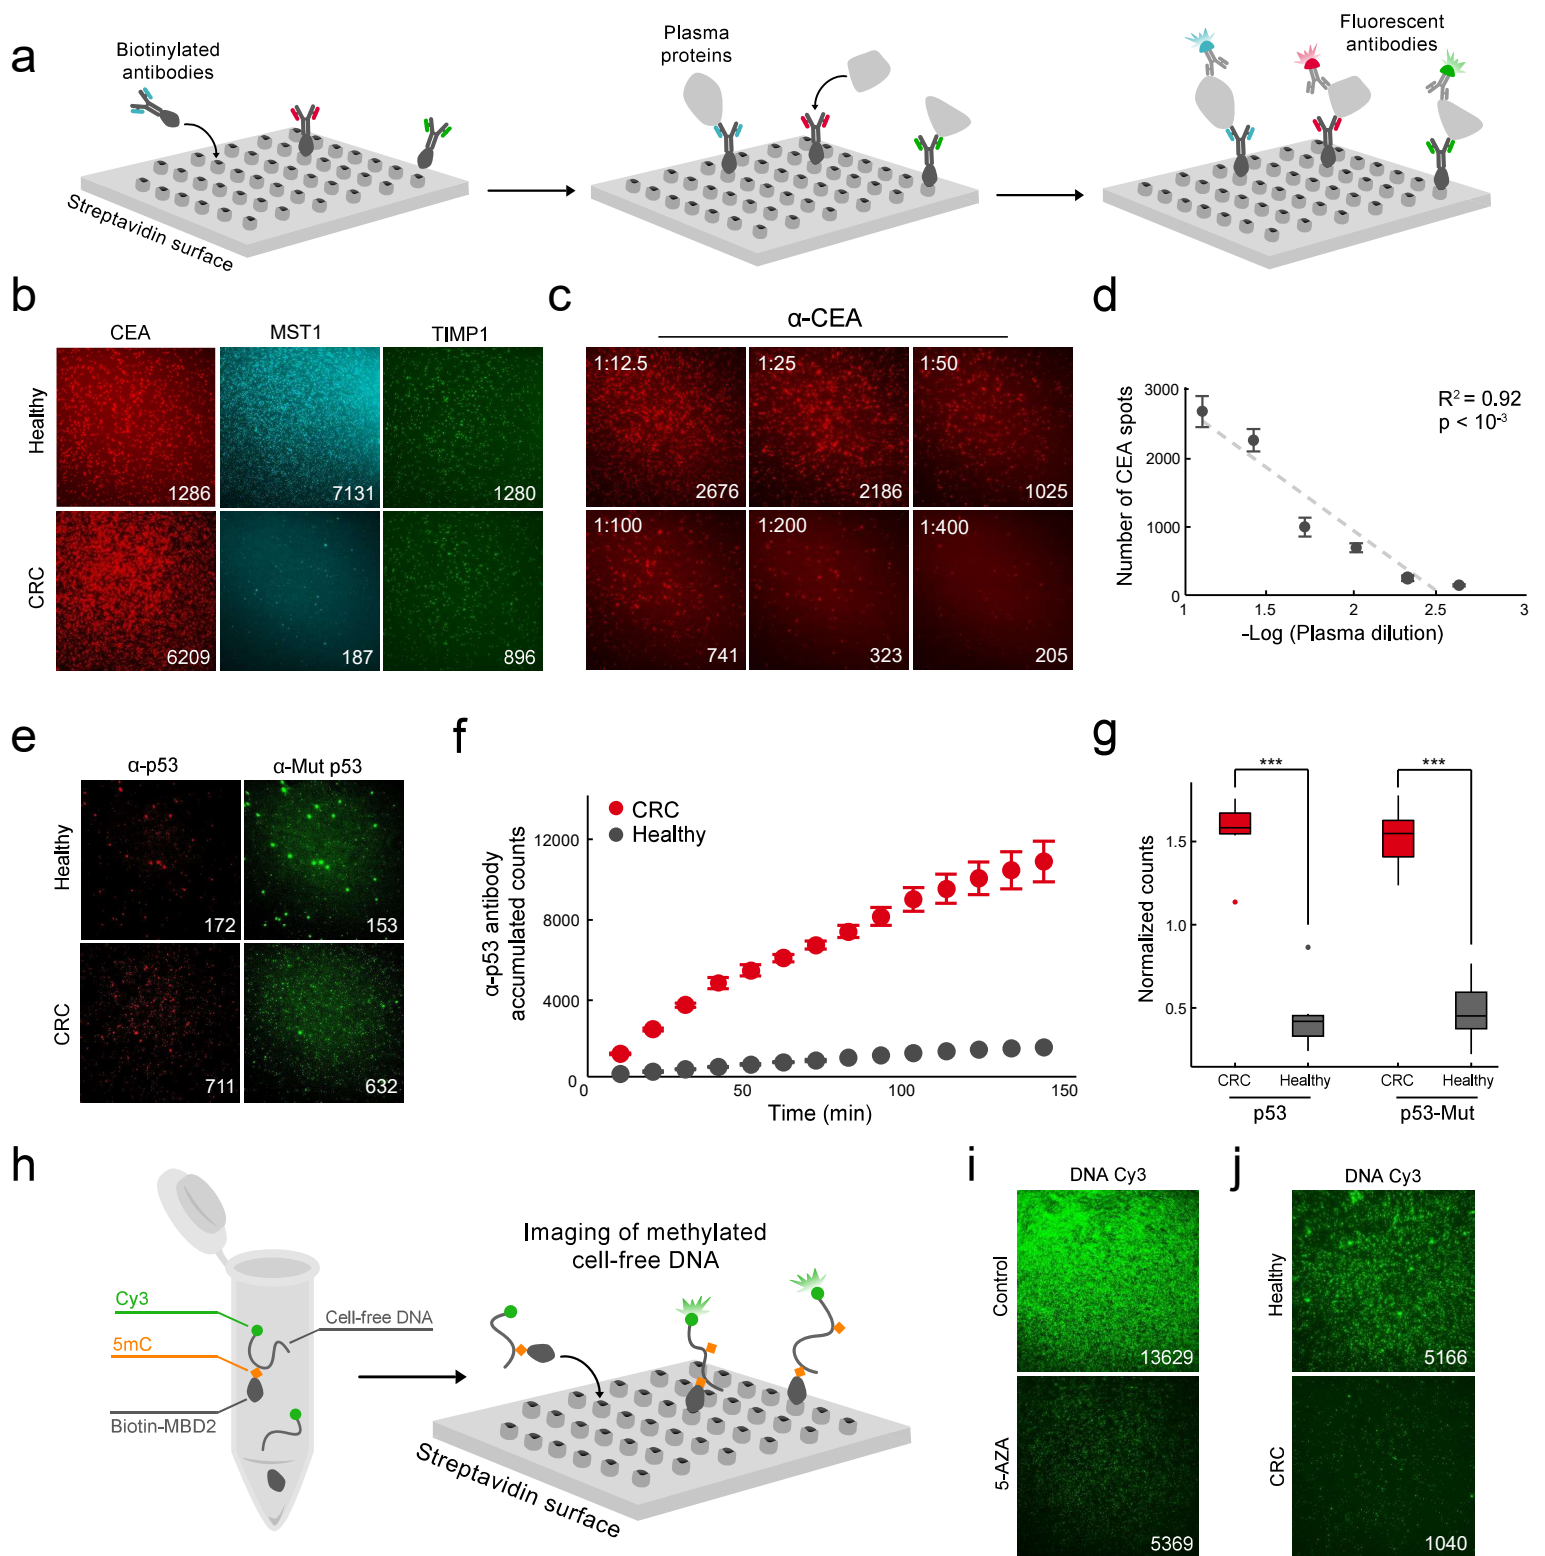

609 **Fig.2: Multiplexed single-molecule detection of cancer-associated protein biomarkers,**  
610 **mutant p53 and DNA methylation.**

611 **a**, Experimental scheme: biotinylated capture antibodies targeting distinct proteins are anchored  
612 to a PEG-streptavidin surface. Plasma proteins are captured on surface, followed by detection with  
613 fluorescently labeled antibodies and TIRF imaging. Multiplexed detection of up to three proteins  
614 is achieved by labeling antibodies with different fluorophores. Each spot represents a single protein  
615 bound on the surface. **b**, Representative TIRF images of selected CRC biomarkers measured  
616 simultaneously for each plasma sample: CEA (red), MST1 (cyan) and TIMP-1(green). Images  
617 reveal distinct biomarkers profiles for healthy and CRC. **c**, Representative TIRF images depicting  
618  $\alpha$ -CEA antibody binding events (spots) over serial plasma dilutions. **d**, Regression analysis of the  
619 number of spots as a function of plasma concentration highlights the linearity of detection. Data is  
620 presented as the mean +/- s.d. of 50 FOVs for each concentration. **e,f,g** Single-molecule detection  
621 of p53 in the plasma of healthy and CRC patients with known p53 mutations. **e**, Representative  
622 TIRF images. Detection is carried out simultaneously with antibodies targeting all p53 (red) and  
623 with antibodies that are specific to the mutant p53 conformation (green). Large diameter spots  
624 correspond to TetraSpeck beads used for alignment. **f**, p53 signal accumulation over time in late  
625 stage CRC and healthy plasma. Data is presented as the mean +/- s.d. of 50 FOVs for each time  
626 point. **g**, Total and mutant p53 levels in plasma show significantly higher levels in CRC patients  
627 versus healthy individuals (n=6 for each group). Box plots limits: 25–75% quantiles, middle:  
628 median, upper (lower) whisker to the largest (smallest) value no further than 1.5 $\times$  interquartile  
629 range from the hinge. P values were calculated by Wilcoxon rank sum exact test. \*\*\* P value <  
630 0.001. **h**, Experimental scheme for single-molecule imaging of global DNA methylation: MBD2-  
631 biotin is incubated with Cy3-labeled (green) DNA, and binds specifically to methylated DNA  
632 molecules. Next, biotin-MBD-meDNA complexes are immobilized on a PEG-streptavidin surface,  
633 followed by TIRF imaging. Each spot represents a single bound complex, number of spots  
634 correspond to the level of DNA methylation in plasma. **i**, Representative TIRF images of DNA  
635 methylation in HEK293 cells treated with 5-Aza-2'-deoxycytidine, demonstrating significant  
636 reduction in methylation compared to control cells. **j**, Representative TIRF images of global  
637 cfDNA methylation levels in the plasma of CRC and healthy subjects, showing lower DNA  
638 methylation levels in CRC. For all images, numbers within images represent counted spots.

639

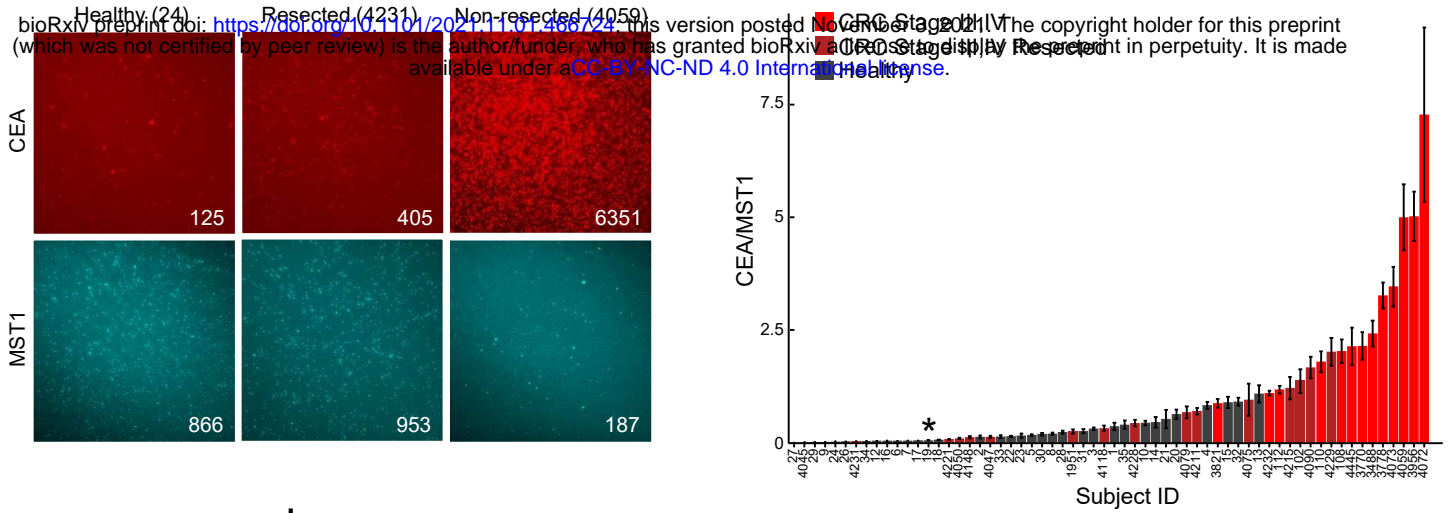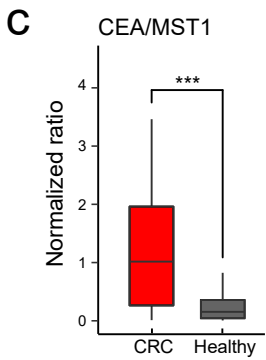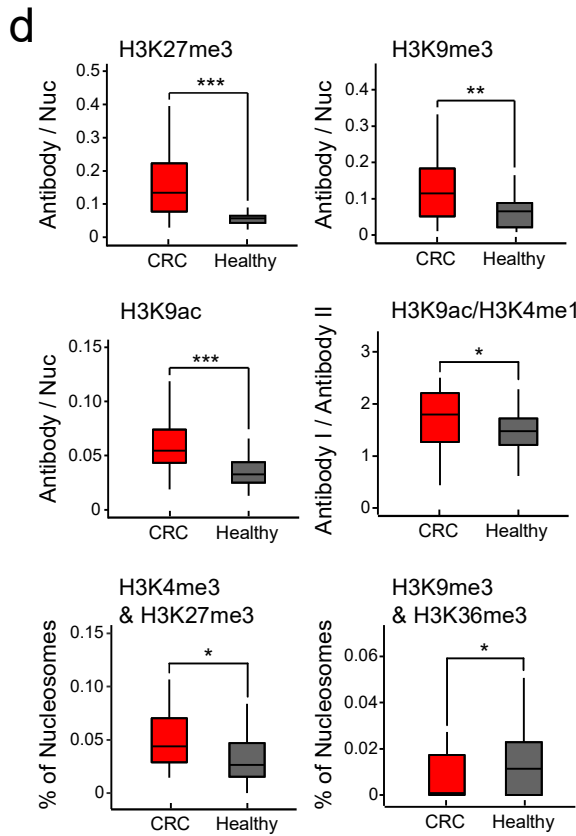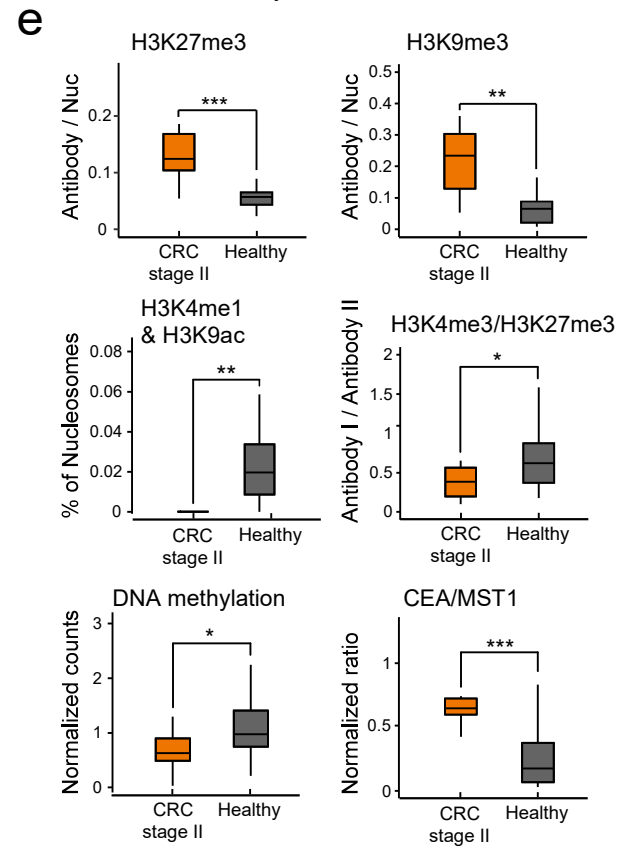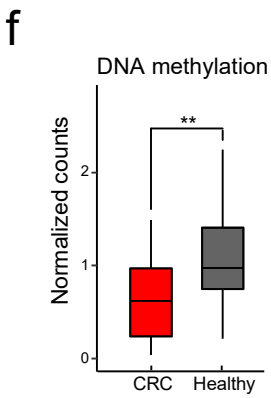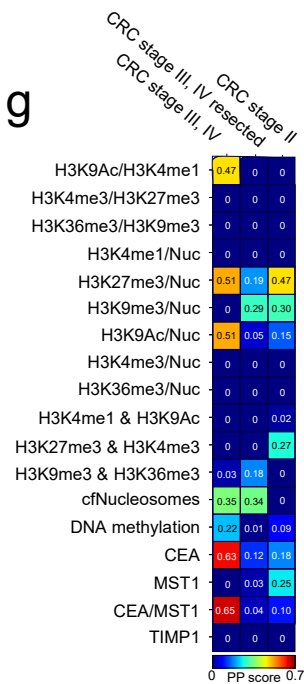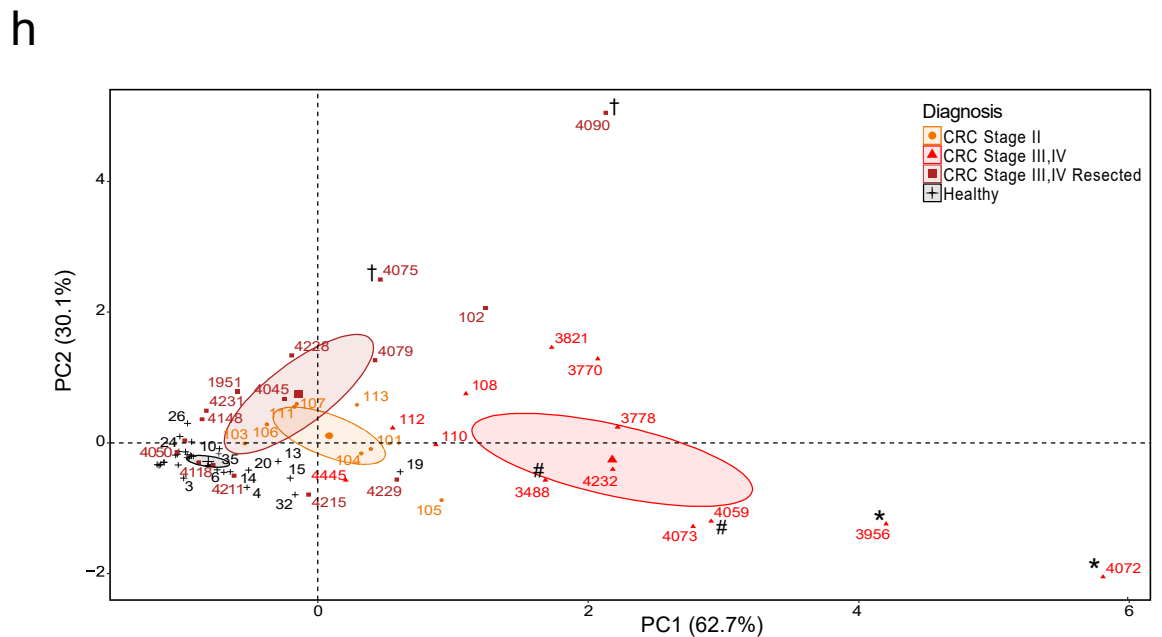



640 **Fig.3: EPINUC reveals significant epigenetic and biomarkers alterations in the plasma of**  
641 **CRC patients.**

642 **a**, Representative TIRF images depict changes in protein biomarker levels in the plasma of healthy,  
643 CRC patient, and CRC following tumor resection. Numbers within images represent counted spots.  
644 **b**, CEA/MST1 normalized levels in the plasma of CRC patients and healthy individuals. Each bar  
645 represents a subject, data is presented as the mean +/- s.d. of 50 fields of view per sample. **c**, Box  
646 plot representation of the data in B (healthy = 33, CRC = 29). Box plots limits: 25–75% quantiles,  
647 middle: median, upper (lower) whisker to the largest (smallest) value no further than 1.5×  
648 interquartile range from the hinge. P values were calculated by Welch's t-test. \*\*\* P value < 0.001.  
649 **d**, Histone PTMs, ratios and combinations (as indicated on the graphs) that significantly differ  
650 between healthy and CRC late stage samples (healthy = 33, CRC = 29). P values were calculated  
651 by Welch's t-test. \* P value < 0.05 \*\* P value < 0.01. \*\*\* P value < 0.001. **e**, Global DNA  
652 methylation levels, measured as in Fig. 2h, in the same cohort as (d). **f**, Histone PTMs, ratios and  
653 combinations (as indicated on the graphs) that significantly differ between healthy and early stage  
654 CRC patients (healthy = 33, early CRC = 8). P values were calculated by Wilcoxon rank sum exact  
655 test. \* P value < 0.05 \*\* P value < 0.01. \*\*\* P value < 0.001. **g**, Individual parameters predictive  
656 power score (PPS) analysis for the various subgroups (see Methods). Color scale represents PPS  
657 value. **h**, Principal Component Analysis (PCA) with input parameters of H3K27me3/Nuc,  
658 CEA/MST1 and CEA. Sample groups are color-coded as indicated, each dot represents a plasma  
659 sample.

660

661

662

663

664

665

666

667

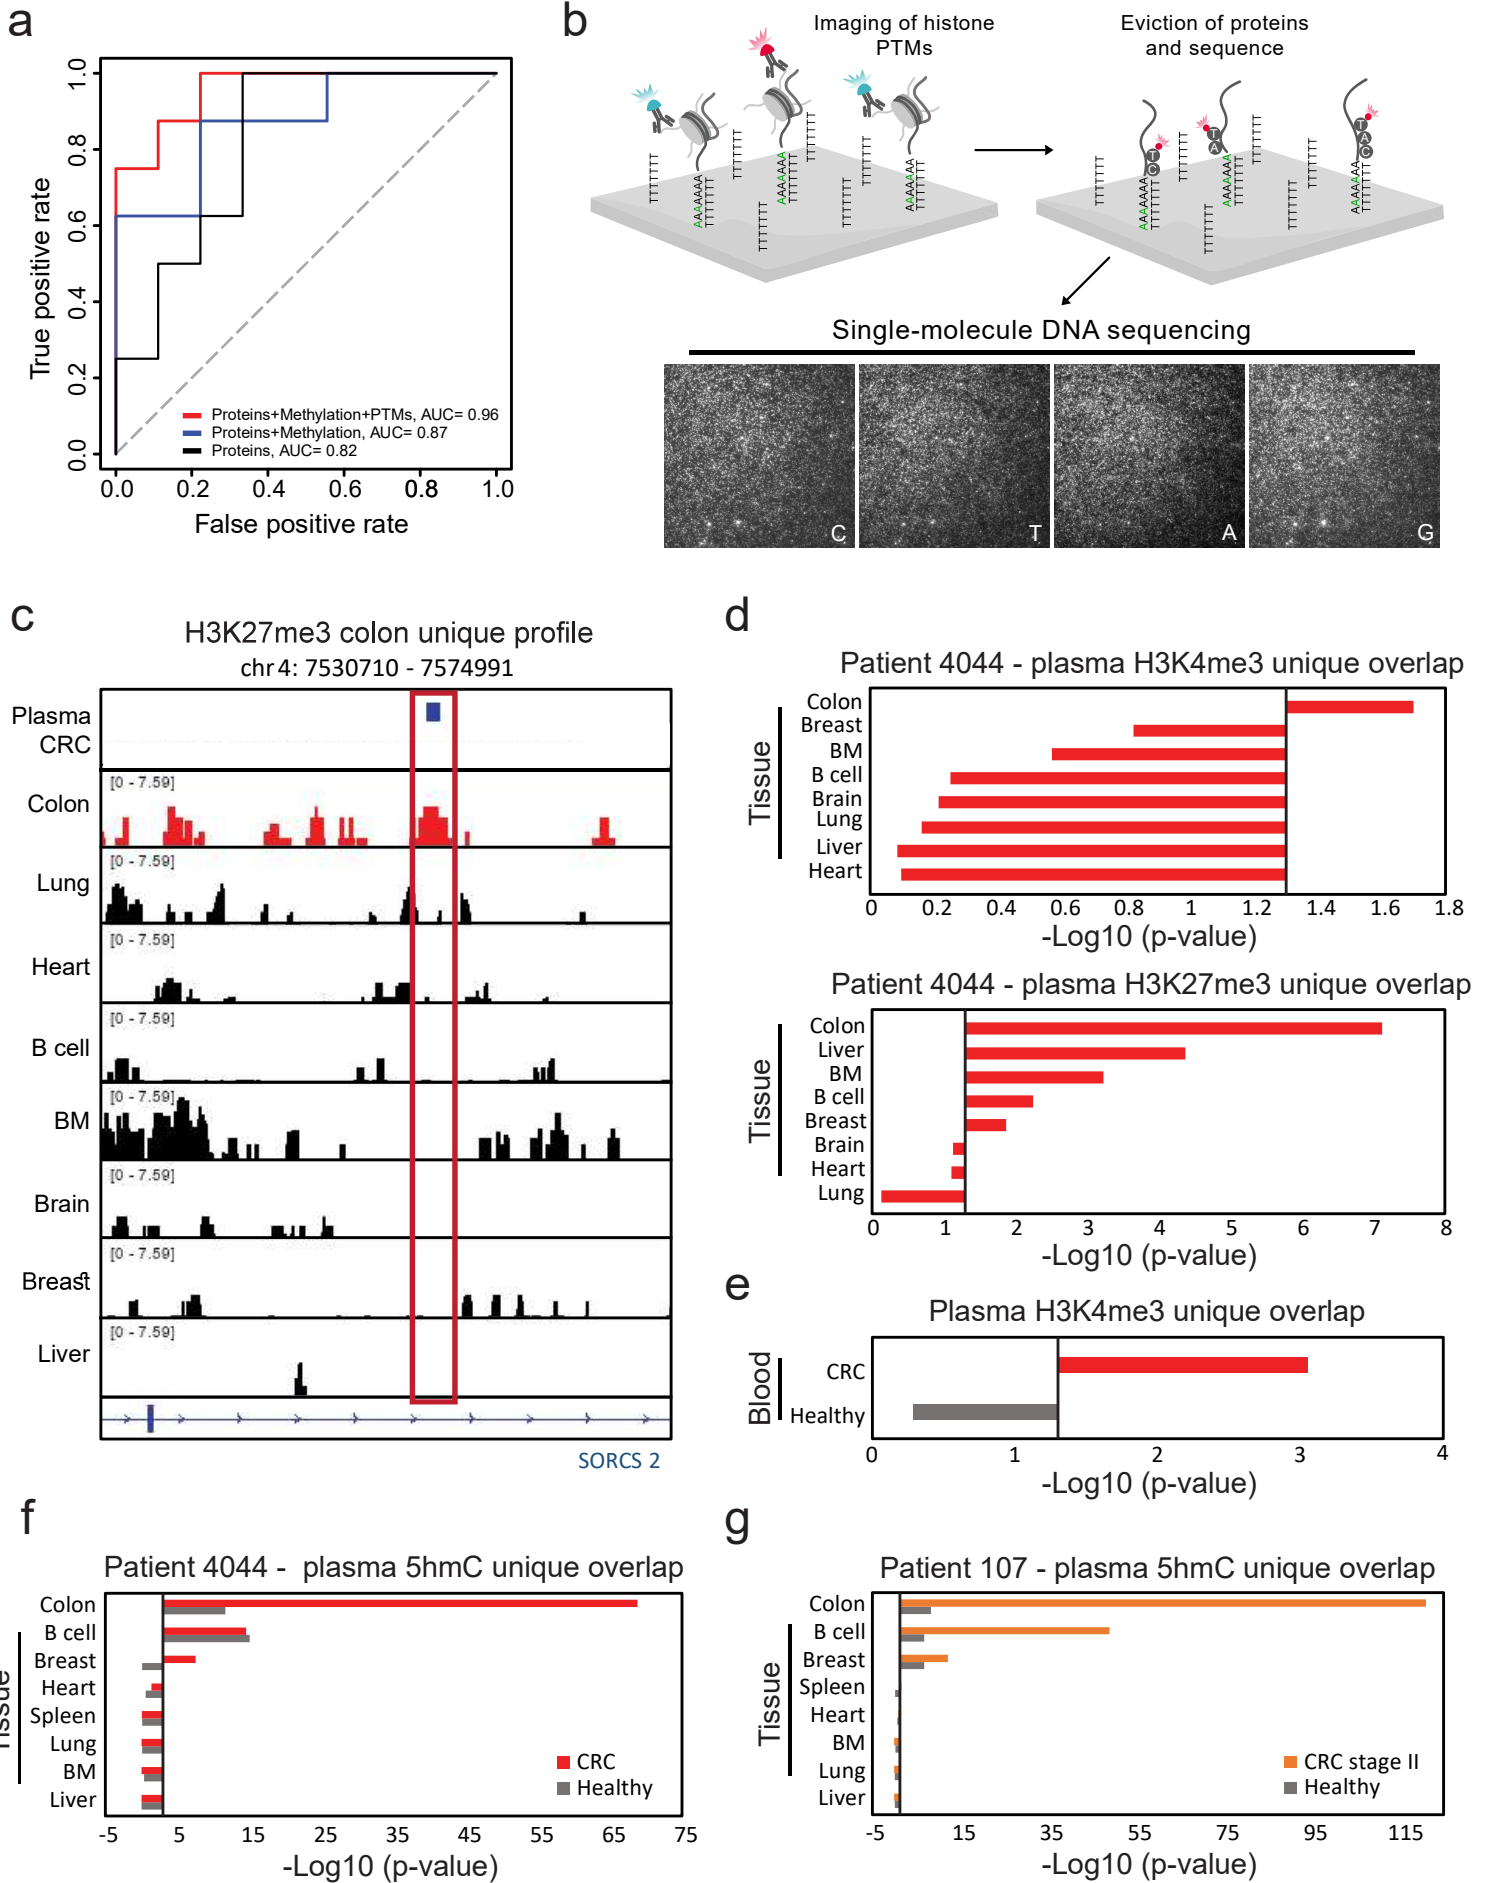

668 **Fig.4: EPINUC differentiates healthy versus CRC patients and informs the tumor tissue-of-**  
669 **origin.**

670 **a**, ROC curves discriminate between healthy (n=33) and all CRC samples (n=37) using a logistic regression model.  
671 The area under the curve (AUC) is shown for protein biomarkers only (Proteins; CEA + CEA/MST1, black line),  
672 protein biomarkers in combination with global DNA methylation levels (Proteins + Methylation, blue line) and the  
673 complete dataset generated by EPINUC (Proteins + Methylation + PTMs, Red line). Gray diagonal line indicates  
674 expected curve for random classification. **b**, Experimental scheme for EPINUC-seq. Histone PTMs are decoded as  
675 shown in Fig. 1A. Next, histones are evicted by increasing salt concentration, retaining DNA strands at identical  
676 positions. Single-molecule DNA sequencing-by-synthesis is performed by cycles of incorporation of fluorescently  
677 labeled nucleotides and TIRF imaging<sup>21</sup>. Images represent four sequencing cycles, showing incorporation of cytosine  
678 (C), thymine (T), adenosine (A) and Guanine (G). For each x,y coordinate on the surface, sequence data is analyzed  
679 and integrated with the initial images that registered histone PTMs, revealing the modification state of the  
680 corresponding nucleosome. **c**, Single-molecule reads of H3K27me3 (blue) from CRC patient overlap with ChIP-seq  
681 profile of H3K27me3 in the colon, but not the other indicated tissues. BM=bone marrow. **d**, Tissues and primary cell  
682 lines ranked by overlap significance with single-molecule plasma H3K4me3 (top) or H3K27me3 (bottom) positive  
683 reads. Black line corresponds to P value of 0.05. P values were determined by Z-test. **e**, Overlap significance of  
684 H3K4me3 single-molecule reads with ChIP-seq data<sup>13</sup> performed in the plasma of healthy and CRC patients. **f,g**,  
685 Overlap significance of tissues and primary cell lines unique H3K36me3 profiles with single-molecule 5hmC reads  
686 from healthy versus late stage CRC (f) or early stage CRC (g), calculated as in (e). Black line corresponds to P value  
687 of 0.05. P values were determined by Z-test.

688

689

690

691

692

693

694

695

696

697

698

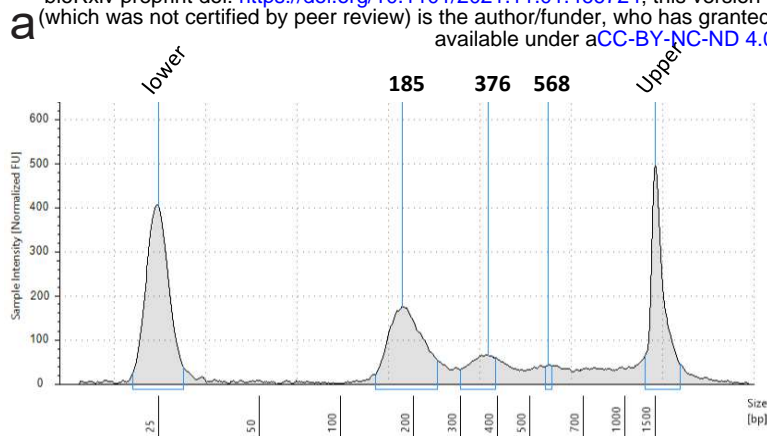

**Medium**  
**cfNucleosomes**

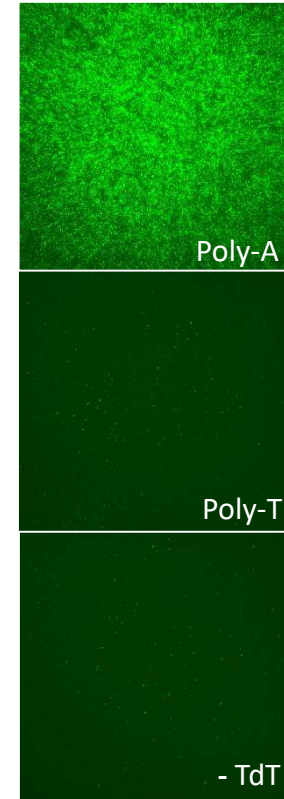

**b** Medium  
cfNucleosomes

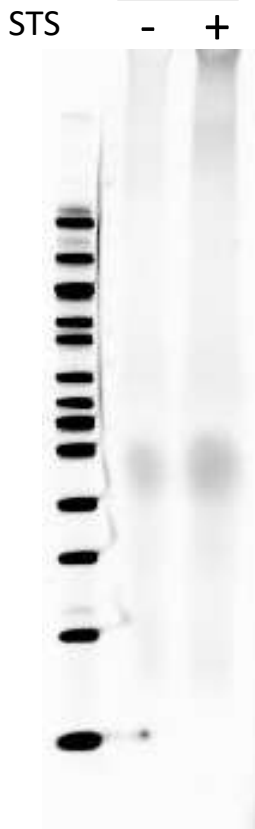

**c** Mnase

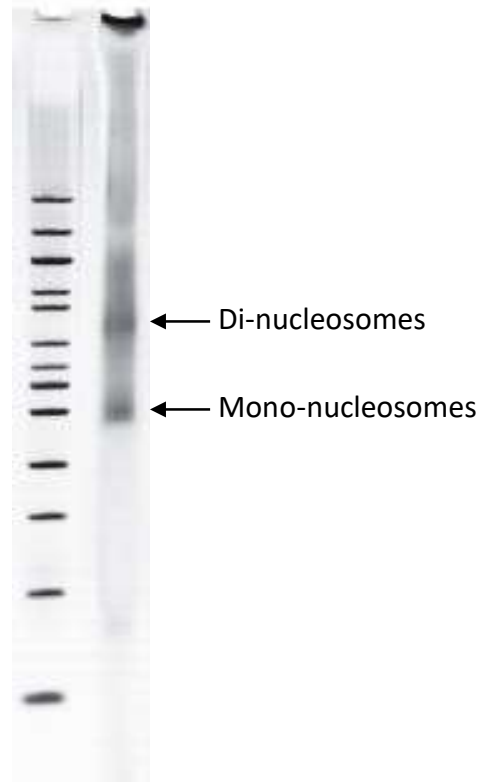

**d** TdT + + + + -  
Cy3-dATP (uM) - 20 2 0.2 20

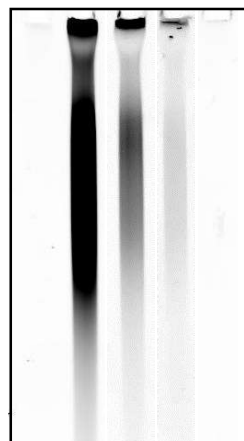

**e**

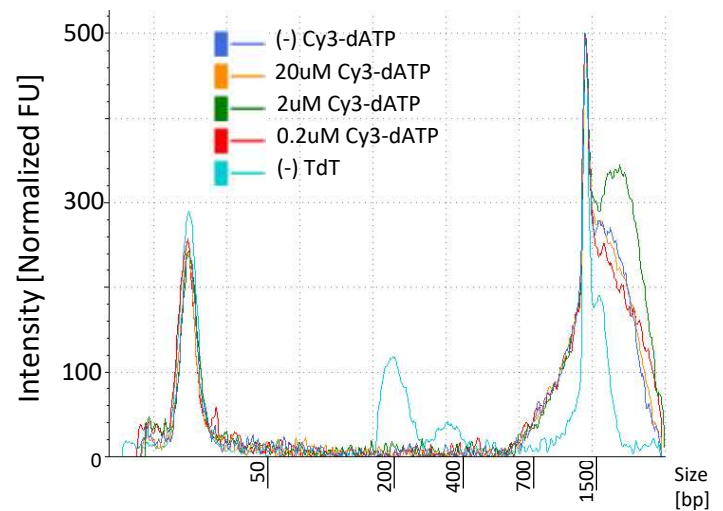

699 **Supplementary Figure 1**

700 **In-vitro system for sample preparation of cfNucleosomes.**

701 **(a)** TapeStation fragment size analysis of DNA isolated from medium of HEK293 cells treated  
702 with the apoptosis-inducing factor Staurosporine (STS). DNA exhibits canonical apoptotic DNA  
703 fragmentation pattern. **(b)** Nucleosomes from medium of HEK293 cells (described in a) treated  
704 with STS (+) or with PBS (-) were resolved on a 6% TBE gel and visualized by Typhoon laser  
705 scanner. **(c)** Nucleosomes were extracted from HEK293 cells by digestion with MNase<sup>21</sup>, resolved  
706 on a 6% TBE gel and visualized by Typhoon laser scanner. Bands correspond to mono-  
707 nucleosomes and di-nucleosomes. **(d)** Nucleosomes from medium of HEK293 cells (described in  
708 a) were subjected to tagging and tailing reaction (see Methods), resolved on a 6% TBE gel and  
709 visualized by Typhoon laser scanner. Image depicts fluorescent labeling via incorporation of Cy3-  
710 dATP during polyadenylation reaction. Incorporation is dependent on the presence of TdT in the  
711 reaction, and level of florescent signal correlates with the concentration of Cy3-dATP (Left). **(e)**  
712 TapeStation fragment size analysis of the samples in (d). **(f)** Poly-dA tailed and Cy3-dATP labeled  
713 cfNucleosomes show specific anchoring to PEGylated poly-dT surfaces through A:T  
714 hybridization.

715

716

717

718

719

720

721

722

723

724

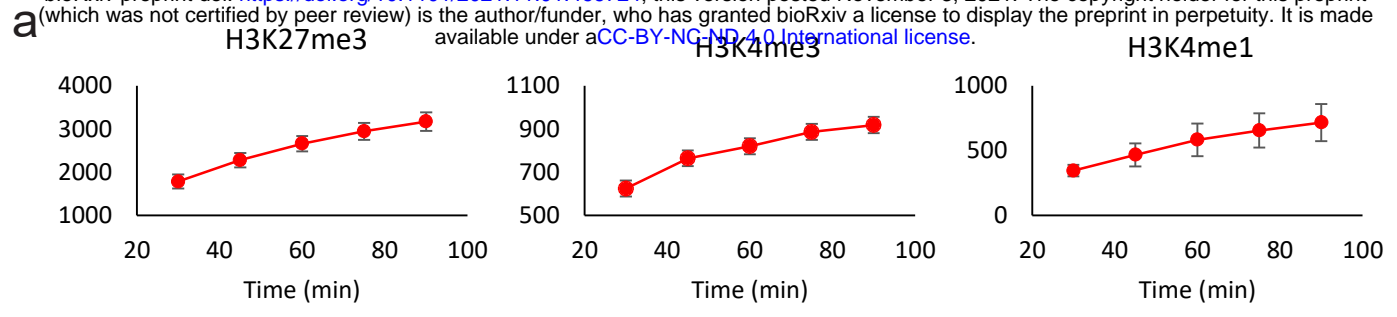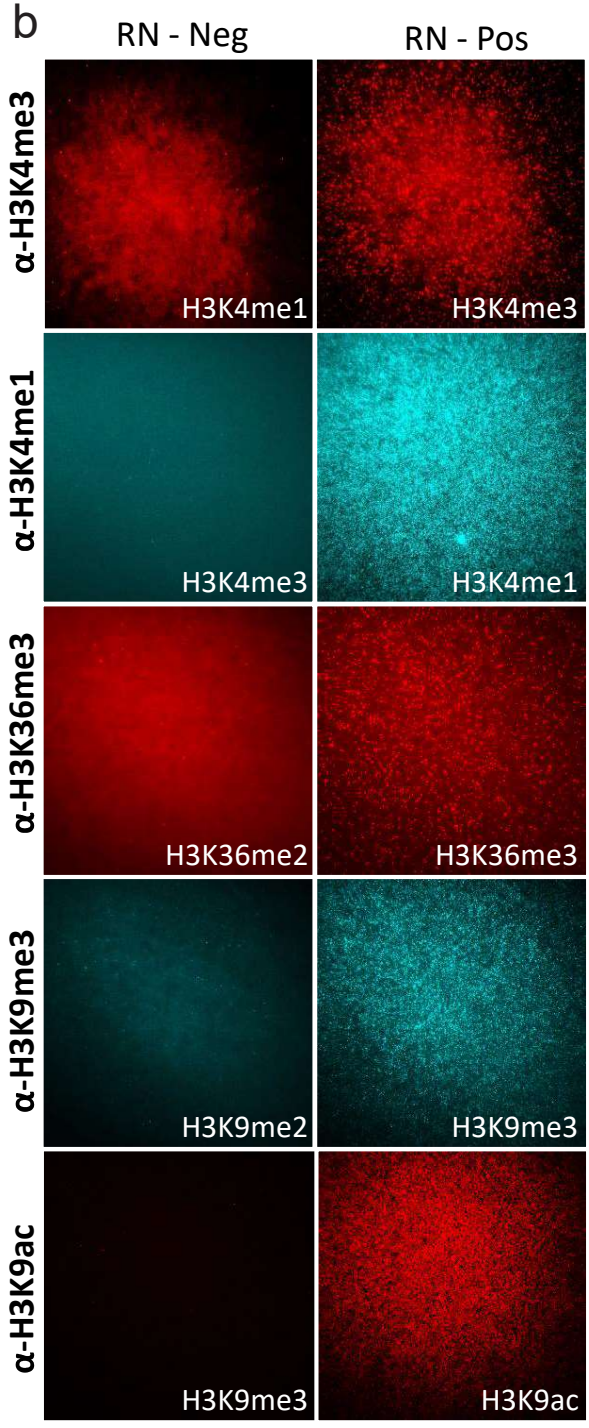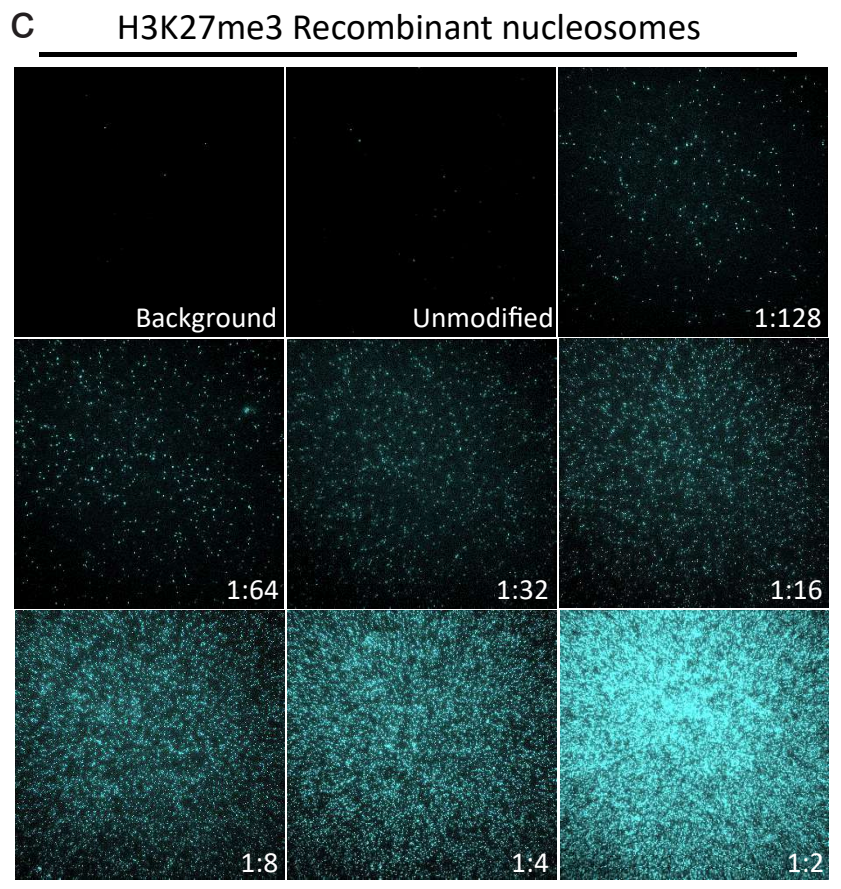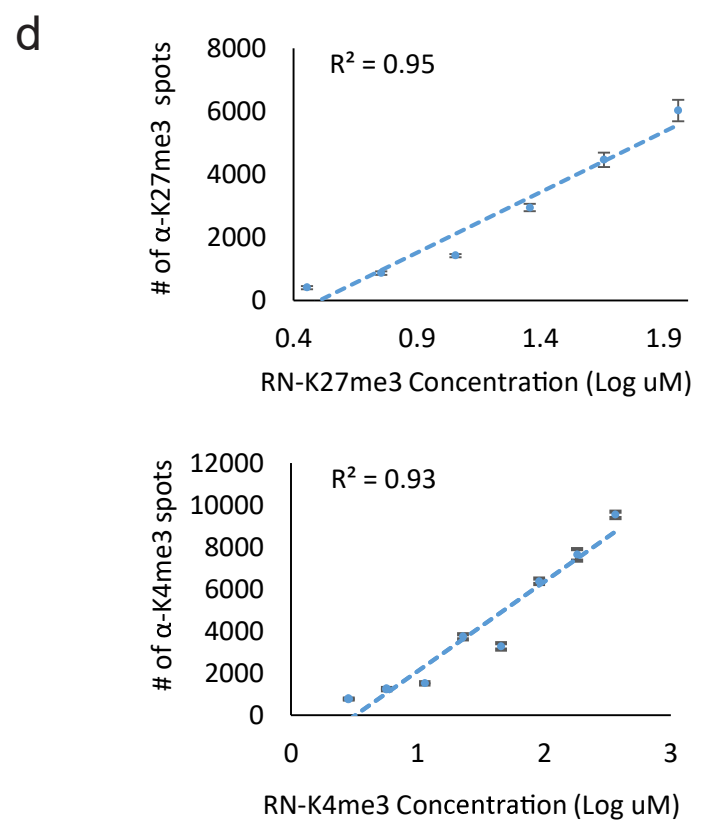

725 **Supplementary Figure 2**

726 **Single-molecule measurements of antibodies' specificity and dynamics.**

727 **(a)** Accumulation of unique antibody binding events over time. Data is presented as the mean +/-  
728 standard deviation (s.d.) of 50 FOVs for each time point. **(b)** Representative TIRF images  
729 demonstrate antibodies binding to various recombinant nucleosomes (RN) carrying different  
730 histone PTMs. Left images: negative control, showing very low un-specific binding of fluorescent  
731 antibodies to recombinant nucleosomes that do not carry the target PTM. Right: binding of  
732 antibodies to recombinant nucleosomes that carry the target modification. The type of modification  
733 is indicated at the bottom of the images. **(c)** Representative TIRF images depicting binding of the  
734 antibody targeting H3K27me3 to an empty surface (Background), unmodified recombinant  
735 nucleosomes (Unmodified), and H3K27me3-modified recombinant nucleosomes diluted as  
736 indicated. **(d)** Regression analysis of number of spots per FOV as a function of target recombinant  
737 nucleosomes' concentration demonstrates low variability along the regression line, supporting  
738 linearity of binding. 1:2 dilution was excluded from analysis due to high density. Data is presented  
739 as the mean +/- s.d. of 50 FOVs for each concentration.

740

741

742

743

744

745

746

747

748

749

750

751

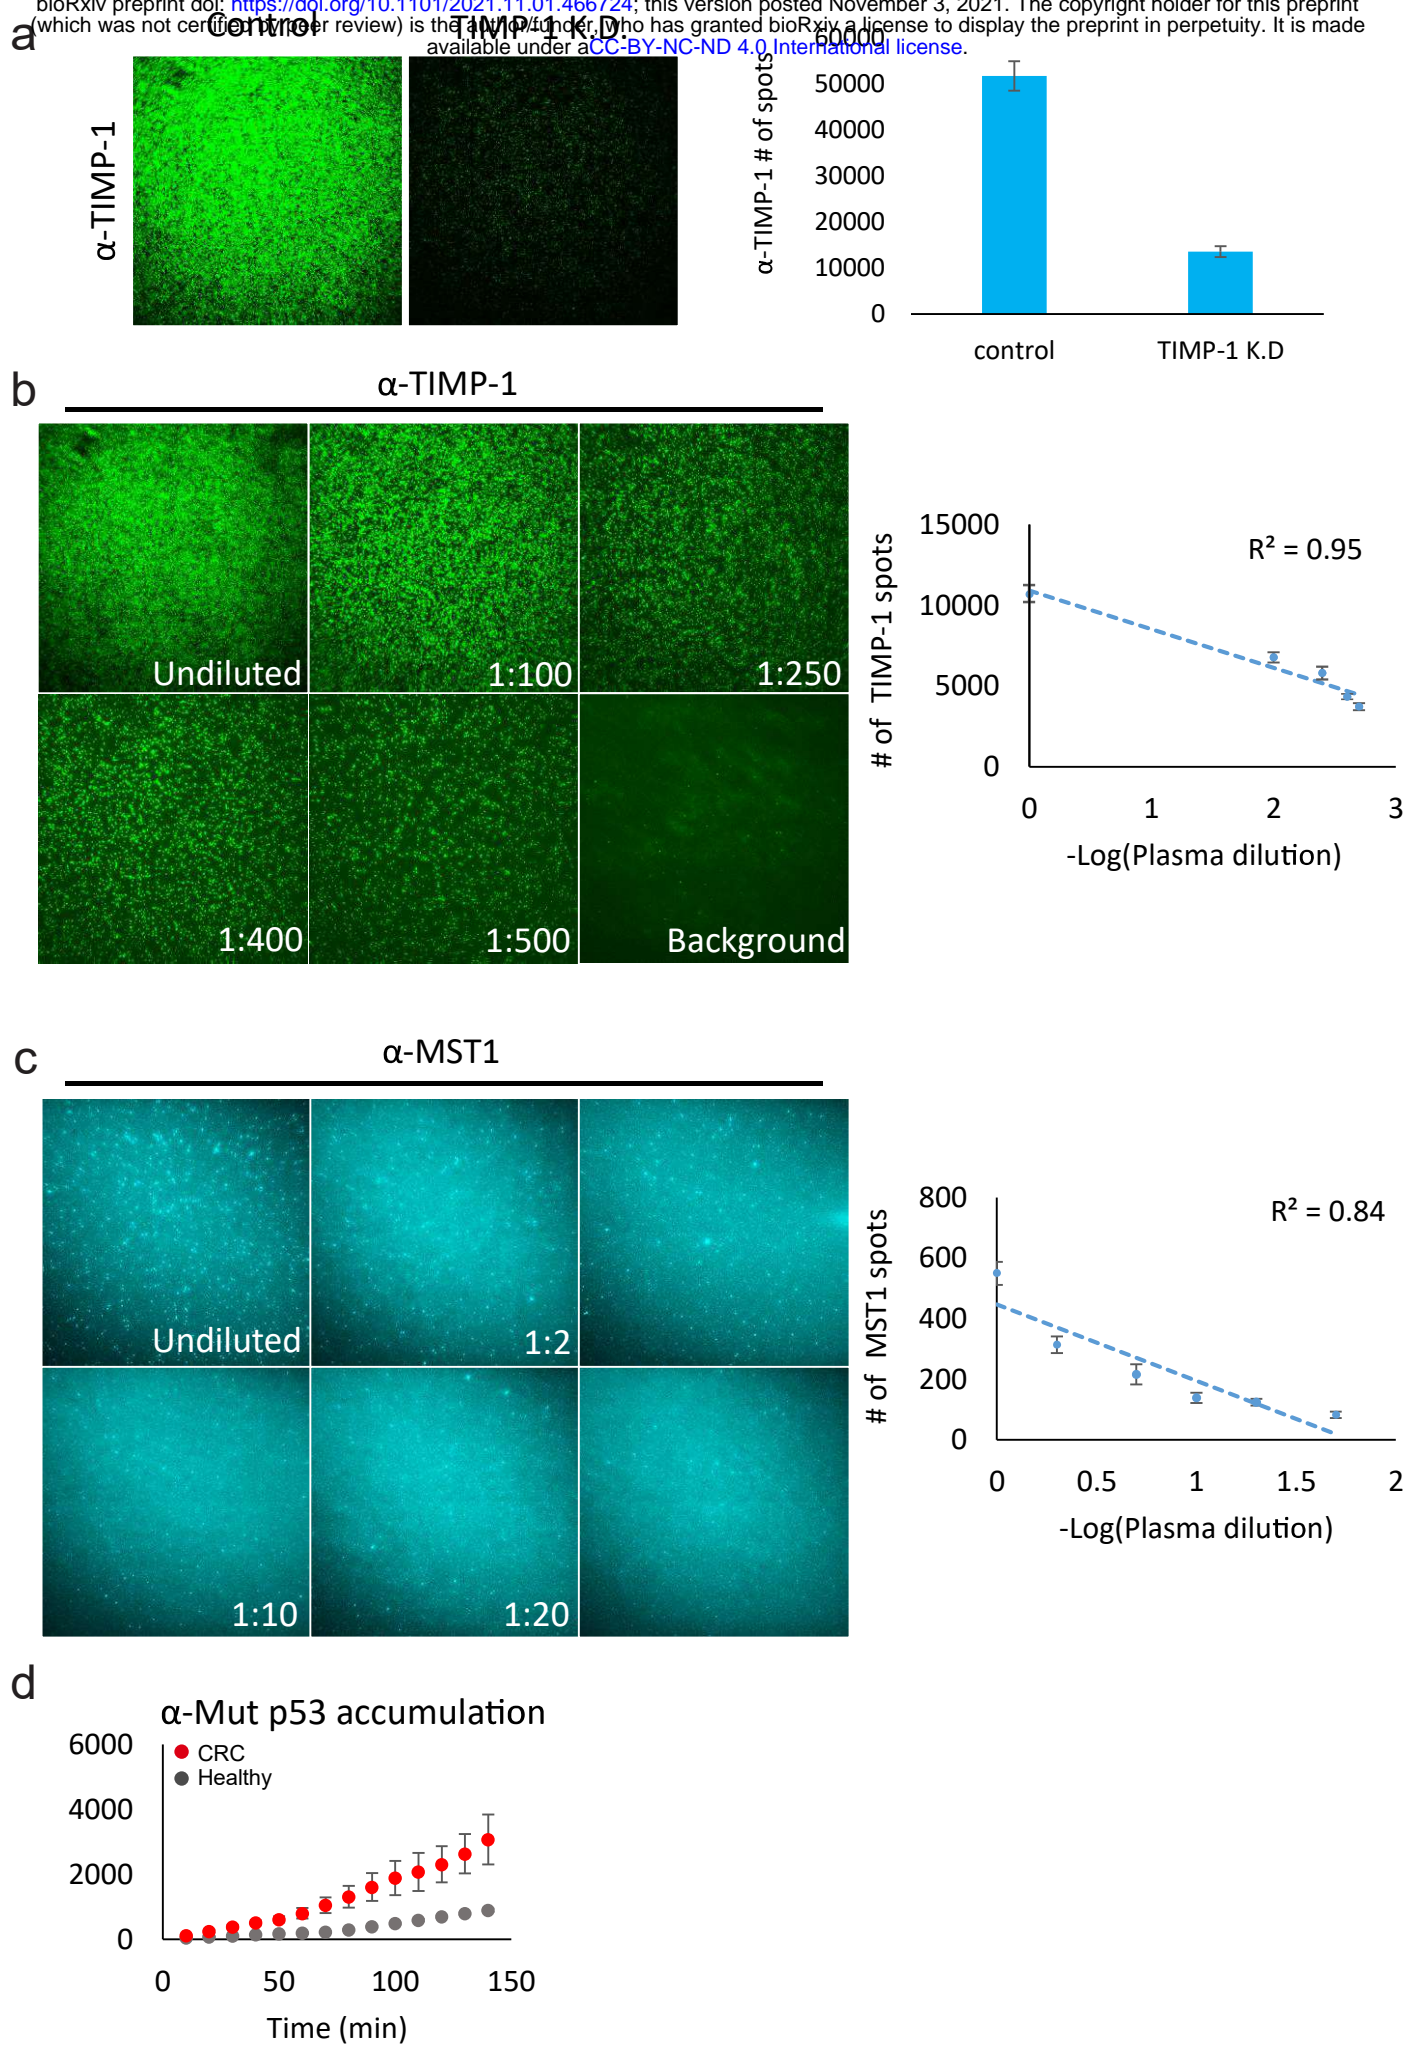



752 **Supplementary Figure 3**

753 **Single-molecule imaging of MST1, TIMP-1 and mutant p53.**

754 **(a)** Representative TIRF images (Left) and quantification (Right) of TIMP-1 protein levels in  
755 SW480 medium, following TIMP-1 knockdown versus control cells. Data is presented as the mean  
756 +/- s.d. of 50 FOVs for each treatment. **(b, c)** Representative TIRF images and standard curves of  
757 antibodies targeting MST1 and TIMP-1 on serial plasma dilutions, depicting linear detection of  
758 molecules within this concentration range. Data is presented as the mean +/- s.d. of 50 FOVs for  
759 each concentration. **(d)** Signal accumulation of mutant p53 over time for late stage CRC and  
760 healthy plasma samples. Each time point is presented as the mean +/- s.d. of 50 FOVs.

761

762

763

764

765

766

767

768

769

770

771

772

773

774

775

776

777

a

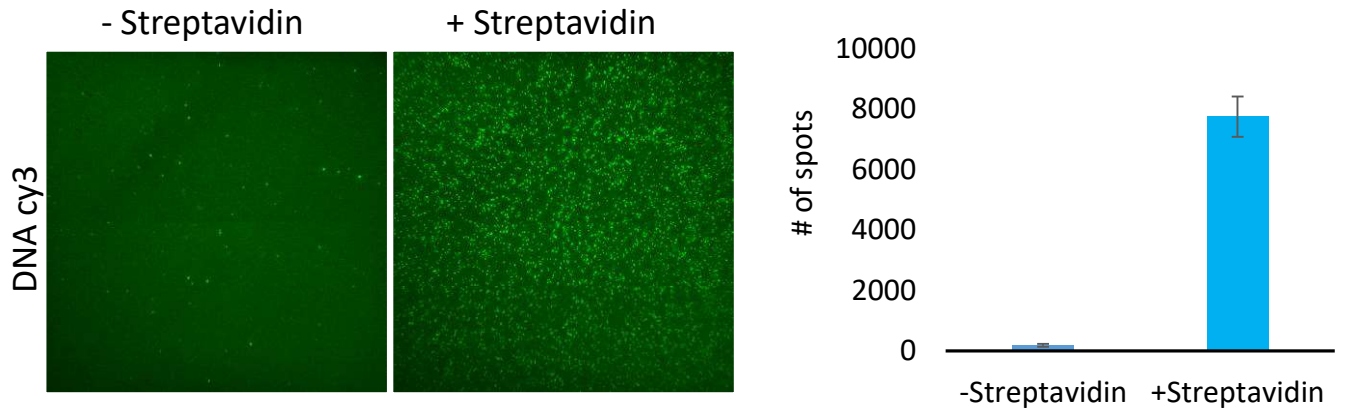

b

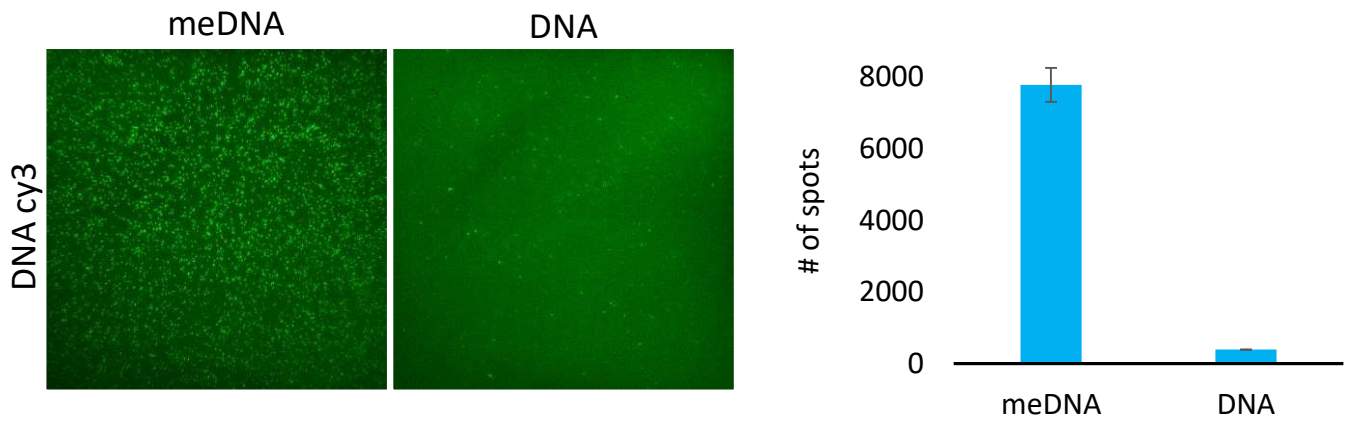

778 **Supplementary Figure 4**

779 **Single-molecule detection of DNA methylation levels.**

780 **(a)** Representative TIRF images (Left) and quantification (Right) indicating specific anchoring of  
781 Biotin-MBD-meDNA complexes to streptavidin-coated surfaces. Data is presented as the mean  
782 +/- s.d. of 50 FOV for each treatment. **(b)** Biotin-MBD specifically binds methylated DNA.  
783 Representative TIRF images (Left) and quantification (Right) of global DNA methylation levels  
784 following incubation of MBD2-biotin with Cy3-labeled (green) methylated (meDNA) or un-  
785 methylated synthetic DNA fragments. Data is presented as the mean +/- s.d. of 50 FOV for each  
786 treatment.

787

788

789

790

791

792

793

794

795

796

797

798

799

800

801

802

803

804

805

806

807

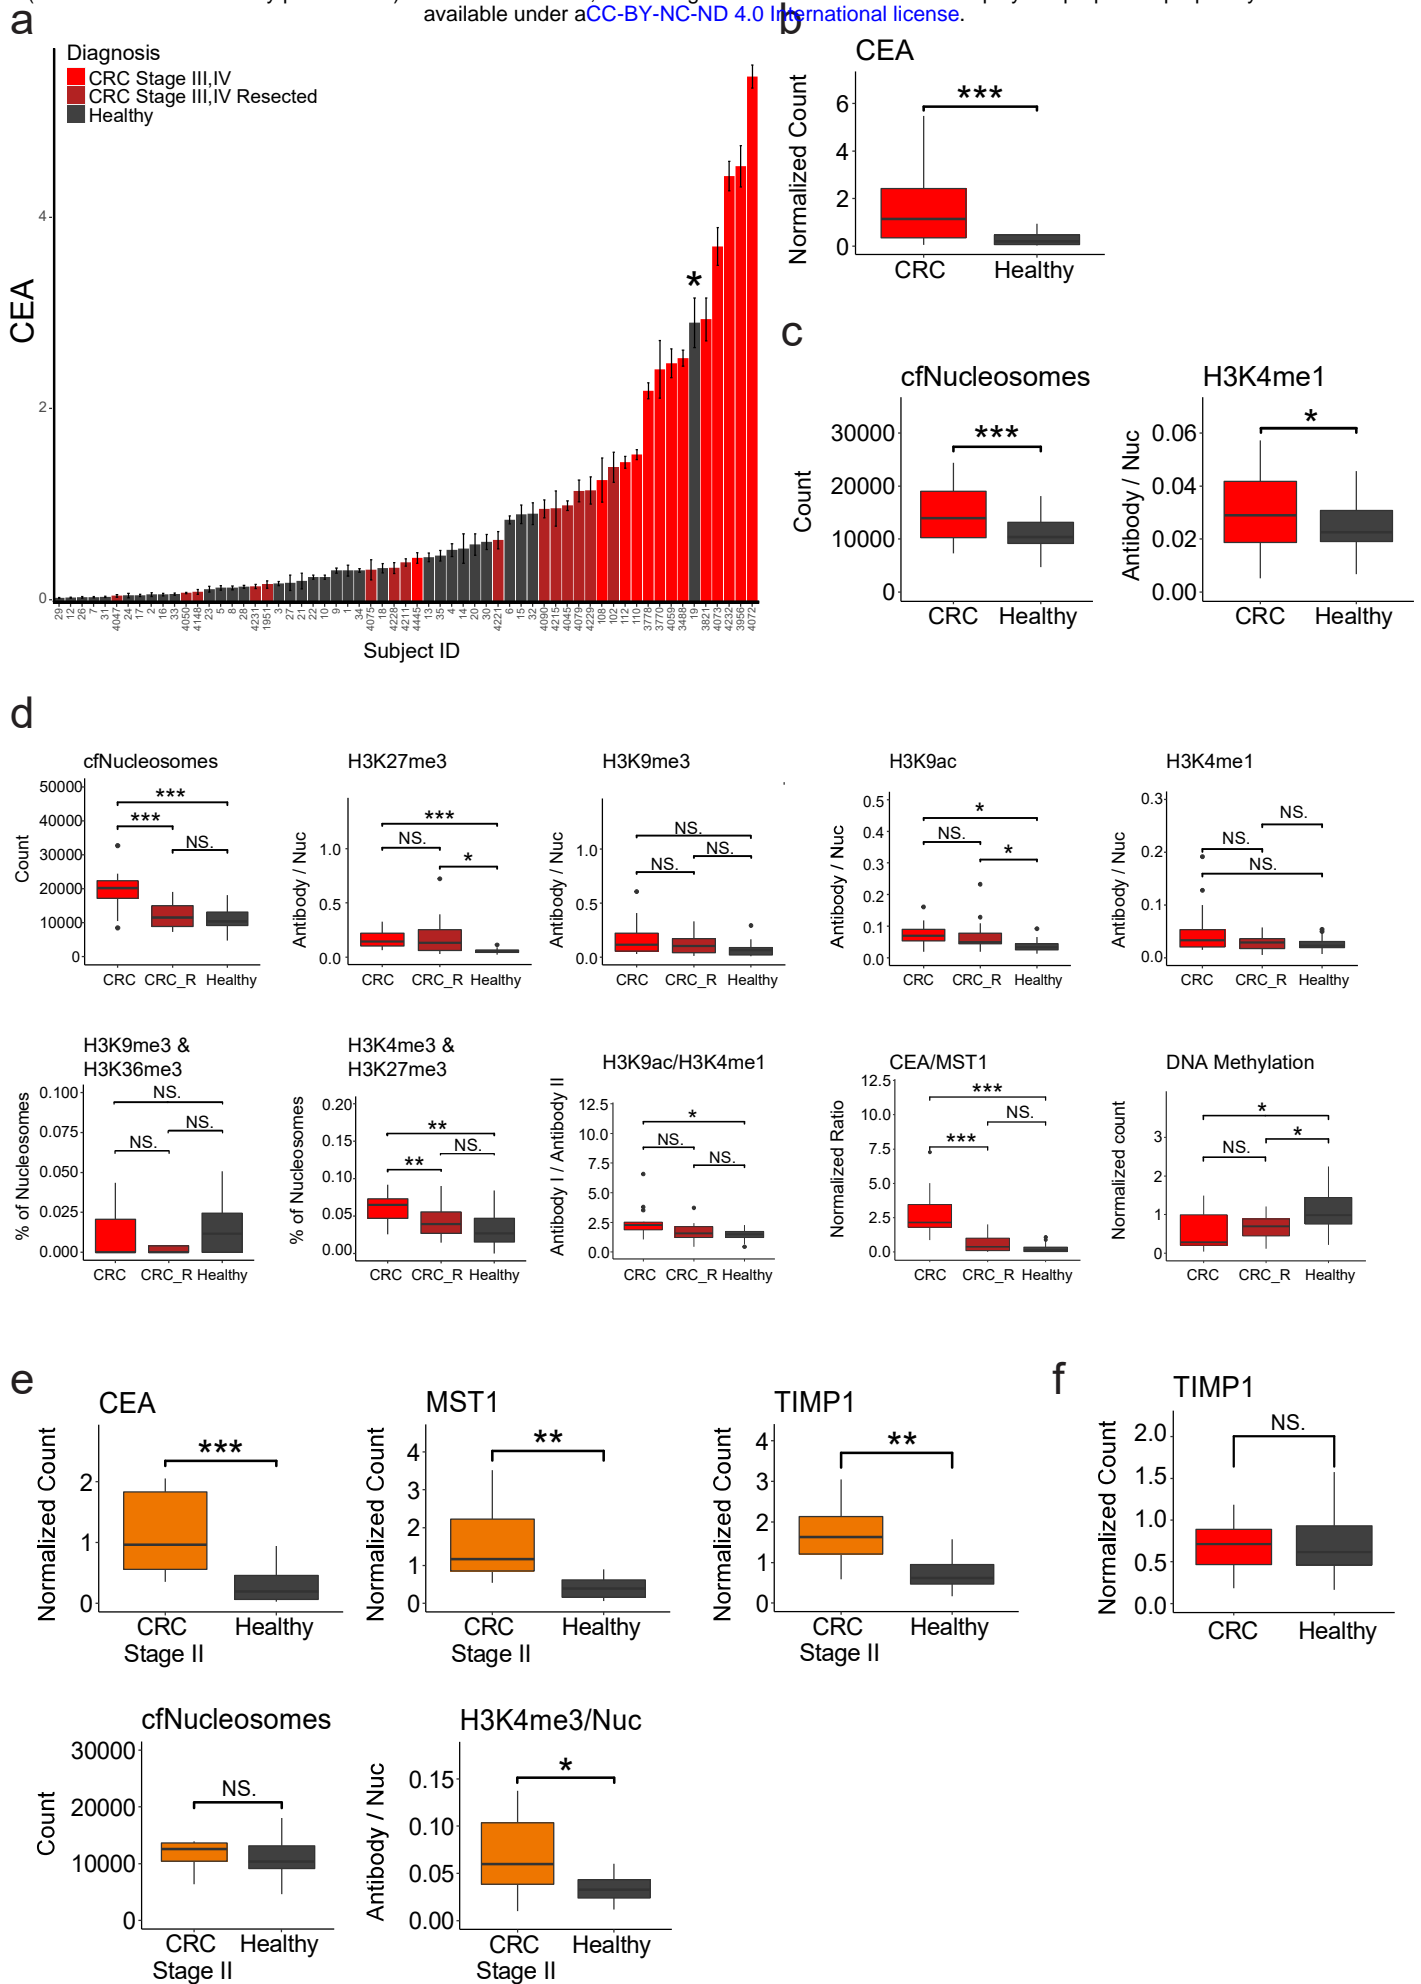

808 **Supplementary Figure 5**

809 **Analysis of histone PTMs, protein biomarkers and DNA methylation in the cohort of plasma**  
810 **samples from healthy and CRC subjects.**

811 **(a)** CEA normalized levels in the plasma of CRC patients and healthy individuals. Each bar  
812 represents a subject, data is presented as the mean +/- s.d. of 50 FOVs per sample. Sample 19  
813 (Healthy) denoted by \*. **(b)** Box plot representation of the data in A (healthy = 33, CRC = 29).  
814 Box plots limits: 25–75% quantiles, middle: median, upper (lower) whisker to the largest  
815 (smallest) value no further than 1.5× interquartile range from the hinge. P values were calculated  
816 by Welch's t-test. \*\*\* P value < 0.001. **(c)** Global level of cfNucleosomes, and levels of H3K4me1-  
817 modified nucleosomes, significantly differ between healthy and CRC late stage samples (healthy  
818 = 33, CRC = 29). P values were calculated by Welch's t-test. \* P value < 0.05 \*\* P value < 0.01.  
819 \*\*\* P value < 0.001. **(d)** Multiple comparison of all significant parameters between CRC, CRC  
820 resected (CRC\_R) and healthy samples (CRC = 13, CRC\_R=16, healthy = 33), corresponding to  
821 the data presented in main Fig. 3c,d,e. Of note, while all of these parameters differ between healthy  
822 versus the combined cohort of all CRC patients, this figure shows the differences between CRC  
823 patients with/without tumor resection. In some parameters, resected patients show higher similarity  
824 to healthy, and in other parameters, they are similar to CRC patients prior to tumor resection. See  
825 methods for P value calculation. \* P value < 0.05 \*\* P value < 0.01. \*\*\* P value < 0.001. **(e)**  
826 Levels of CEA, MST1 and TIMP1, as well as H3K4me3-modified nucleosomes, significantly  
827 differ between healthy and early stage CRC patients (healthy = 33, early CRC = 8). Total levels of  
828 cfNucleosomes do not show significant difference between the groups, likely due to low tumor  
829 burden at early stage patients. P values were calculated by Wilcoxon rank sum exact test. \* P value  
830 < 0.05 \*\* P value < 0.01. \*\*\* P value < 0.001. **(f)** TIMP1 levels do not significantly differ in the  
831 cohort of healthy versus late-stage CRC patients.

832

833

834

835

836

837

838

**a**

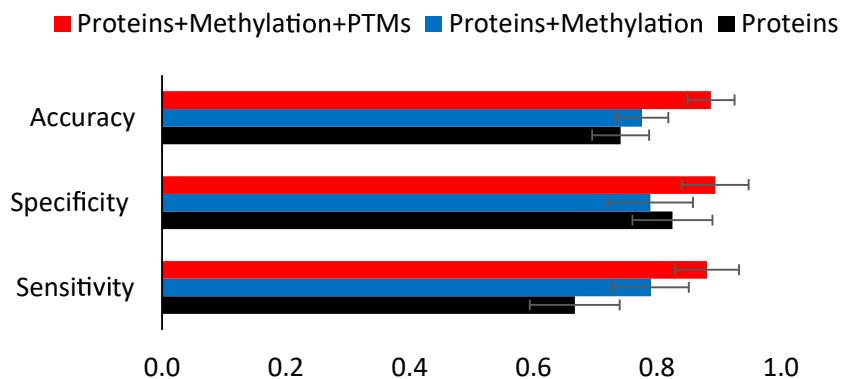

**c**

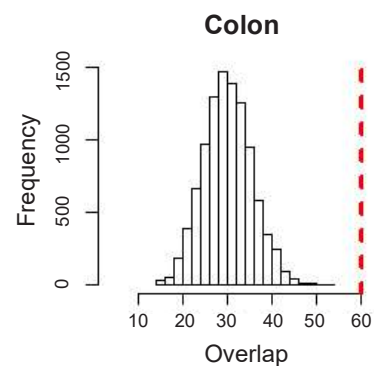

**b**

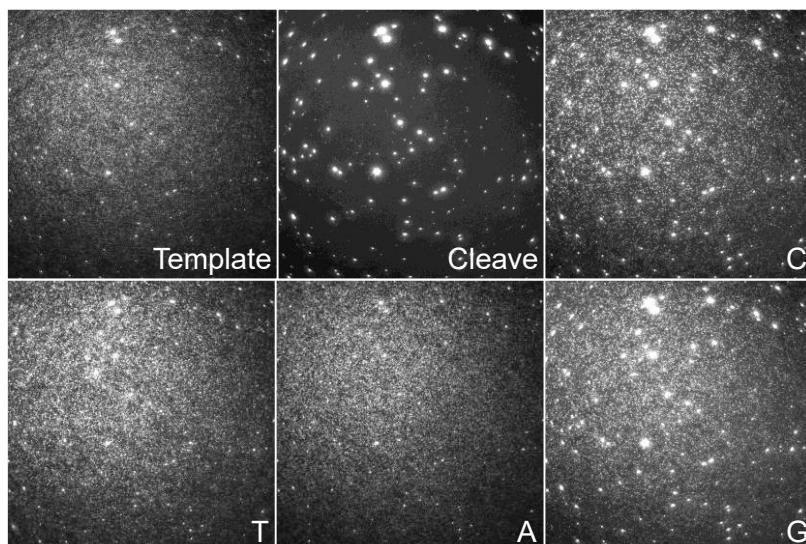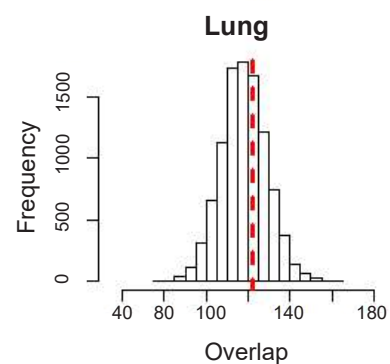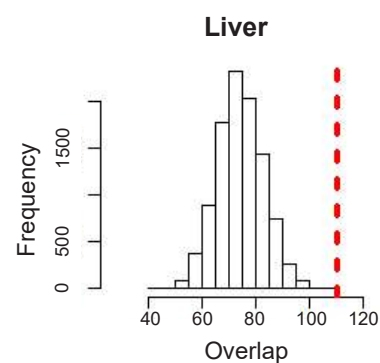

**d**

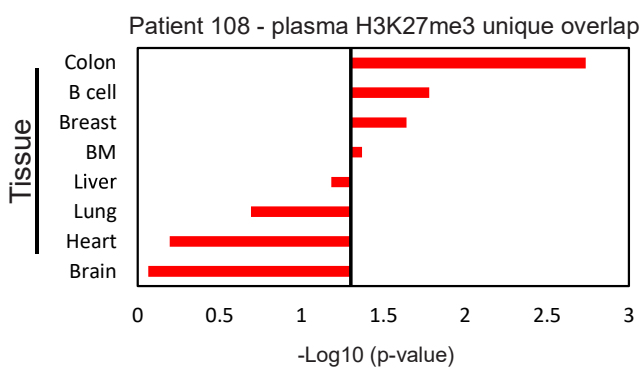

**e**

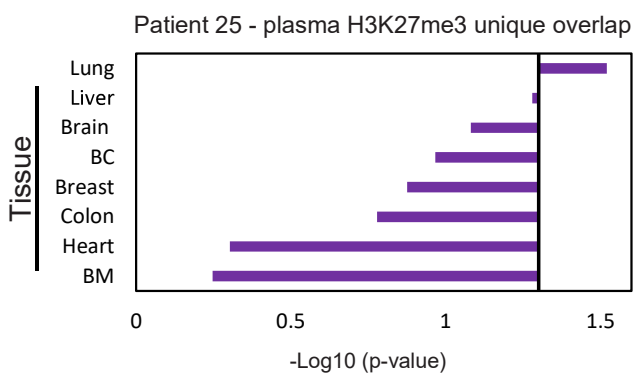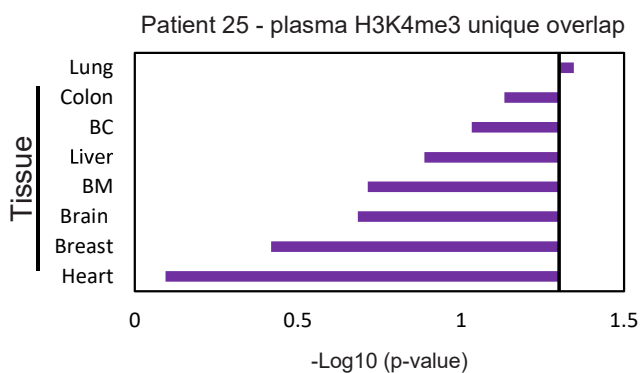

839 **Supplementary Figure 6**

840 **Prediction model performance and Tissue-of-origin analysis based on EPINUC-seq.**

841 **(a)** Logistic model performance increases with integration of additional layers of information.  
842 Corresponds to Fig. 4a. **(b)** Representative TIRF images of antibodies' binding (Template)  
843 followed by cleavage of fluorophore (Cleave) and sequencing cycles (C,T,A,G). High diameter  
844 spots correspond to FluoSpheres used for image alignment. **(c)** Histograms portray colon, lung and  
845 liver frequency distributions of random reads (equivalent to the number of H3K27me3 plasma  
846 CRC positive reads) that overlap with tissue H3K27me3 unique peaks (bootstrapping simulation,  
847 10K iterations, Methods). Red line corresponds to the number of H3K27me3 unique tissue peaks  
848 that overlap with CRC (patient 4044) H3K27me3 positive plasma reads. **(d)** EPINUC-seq analysis  
849 of an additional CRC patient, similar to the analysis shown in Fig. 4d. **(e)** EPINUC-seq analysis  
850 of plasma from stage IV lung cancer patient (patient 25). Tissues and primary cell lines ranked by  
851 overlap significance with single-molecule H3K27me3 (Left) or H3K4me3 (Right) positive reads,  
852 indicating lung as the tissue-of-origin. Black line corresponds to P value of 0.05. P values were  
853 determined by two tailed Z-test or Wilcoxon rank sum test.

854

855

856

857

858

859

860

861

862

863

864

865

866

867

868

869

a

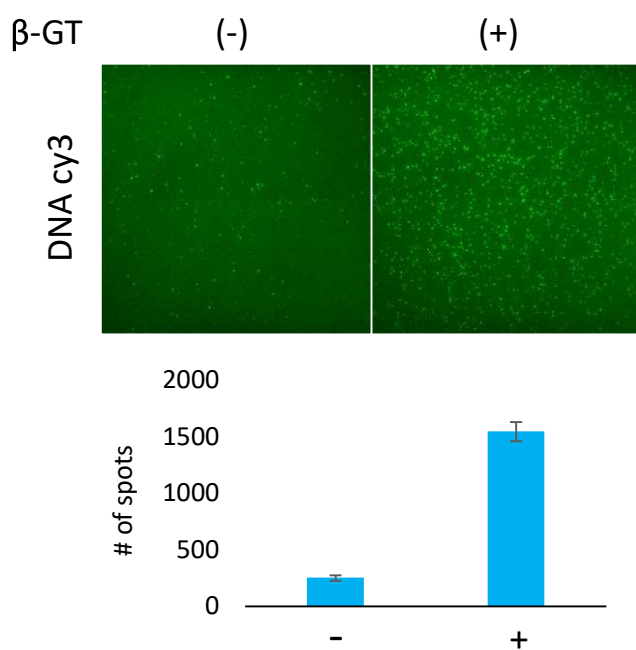

b

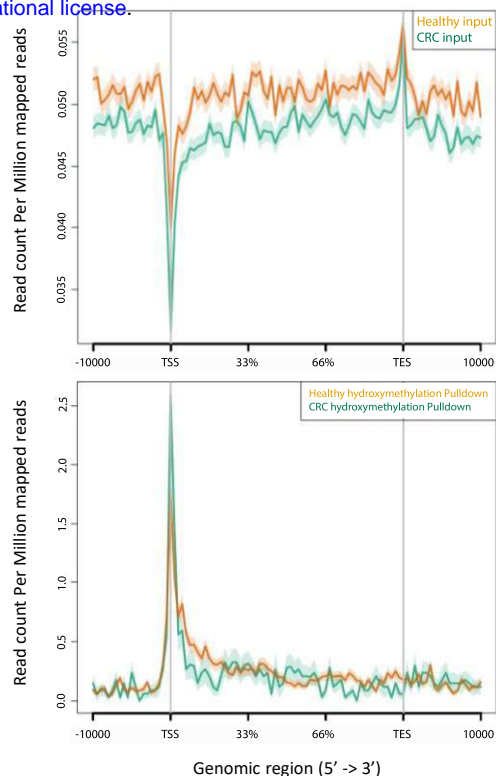

c

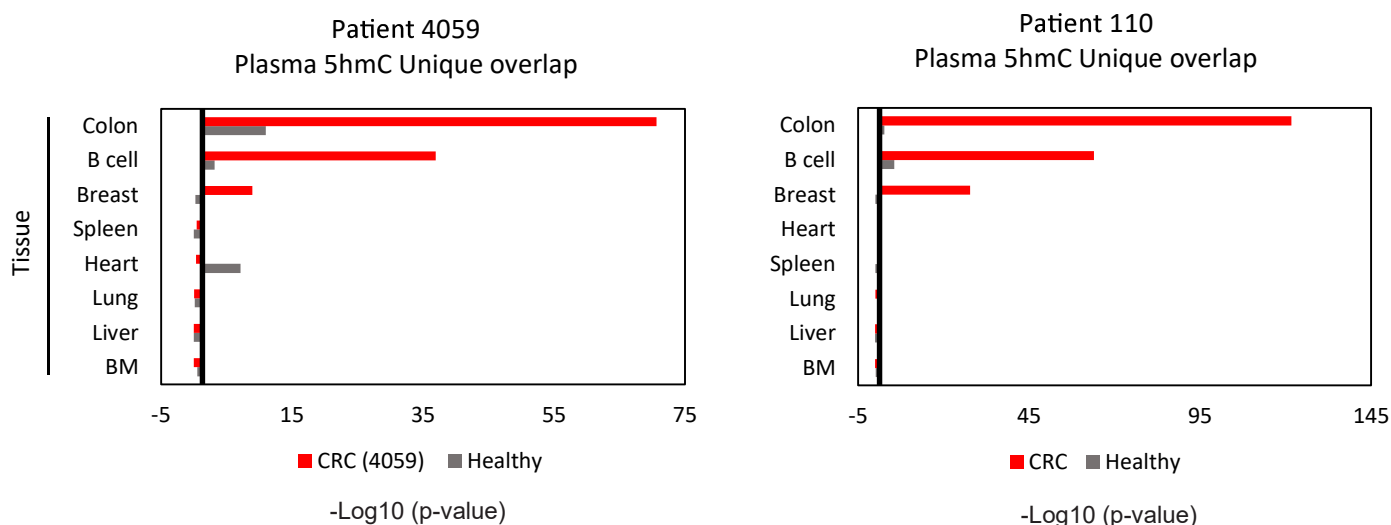

d

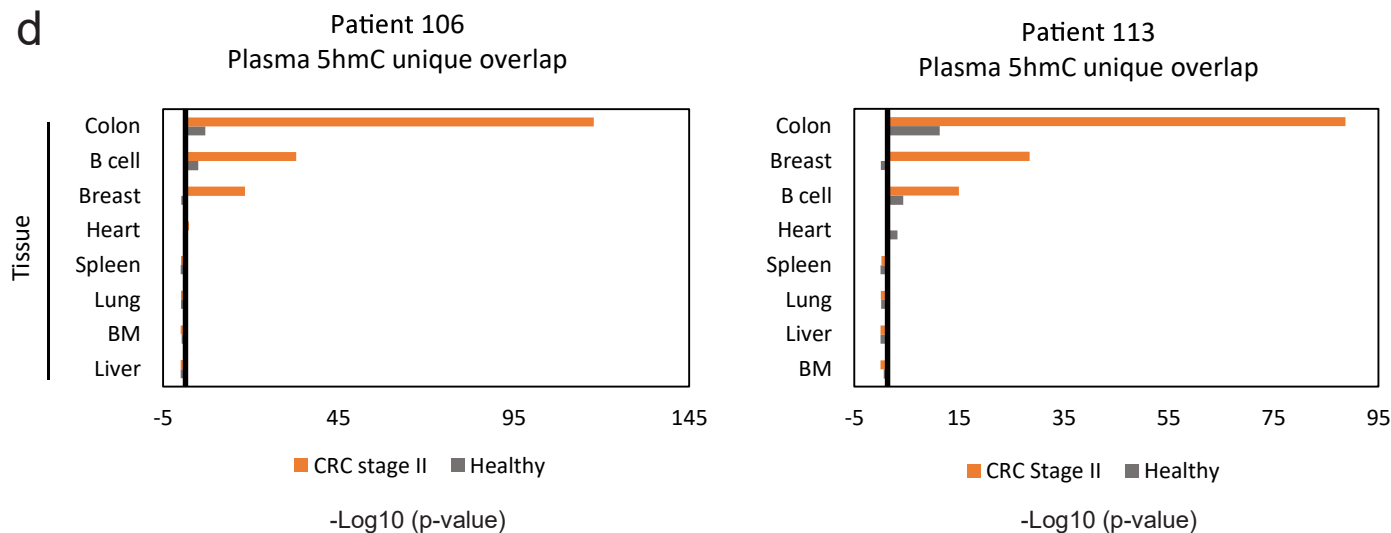



870 **Supplementary Figure 7**

871 **Tissue-of-origin analysis based on single-molecule 5hmC sequencing.**

872 **(a)** Representative TIRF images (Top) and quantification (Bottom) of fluorescently labeled  
873 nucleosomal DNA (Cy3, green) enriched for 5hmC, with (+) or without (-) the biotin conjugating  
874 enzyme beta-glucosyltransferase ( $\beta$ -GT). Data is presented as the mean  $\pm$  s.d. of 50 FOV for each  
875 treatment. **(n)** Metagene profiles of input (Top) and 5hmC enriched (Bottom) cfDNA sequenced  
876 from healthy (n=3, green) and CRC (n=3, Orange) samples, exhibiting 5hmC enrichment at gene  
877 bodies. **(c-d)** Overlap significance of tissues and primary cell lines unique H3K36me3 profiles  
878 with single-molecule 5hmC reads from healthy versus late stage CRC **(c)** or early stage CRC **(d)**,  
879 similar to the analysis shown in Fig. 4f,g. Each panel represents a different patient. Black line  
880 corresponds to P value of 0.05. P values were determined by Z-test.

881

882

883

884

885

886

887

888

889

890

891

892

893

894

895

896

897

898

899

## References

- 900 1. Wan, J. C. M. *et al.* Liquid biopsies come of age: Towards implementation of circulating  
901 tumour DNA. *Nat. Rev. Cancer* **17**, 223–238 (2017).
- 902 2. Bronkhorst, A. J., Ungerer, V. & Holdenrieder, S. The emerging role of cell-free DNA as  
903 a molecular marker for cancer management. *Biomol. Detect. Quantif.* **17**, 100087 (2019).
- 904 3. Heitzer, E., Haque, I. S., Roberts, C. E. S. & Speicher, M. R. Current and future  
905 perspectives of liquid biopsies in genomics-driven oncology. *Nat. Rev. Genet.* **20**, 71–88  
906 (2019).
- 907 4. Lo, Y. M. D., Han, D. S. C., Jiang, P. & Chiu, R. W. K. Epigenetics, fragmentomics, and  
908 topology of cell-free DNA in liquid biopsies. *Science (80-. )*. **372**, (2021).
- 909 5. Xu, R. H. *et al.* Circulating tumour DNA methylation markers for diagnosis and prognosis  
910 of hepatocellular carcinoma. *Nat. Mater.* **16**, 1155–1162 (2017).
- 911 6. Moss, J. *et al.* Comprehensive human cell-type methylation atlas reveals origins of  
912 circulating cell-free DNA in health and disease. *Nat. Commun.* **9**, 5068 (2018).
- 913 7. Kang, S. *et al.* CancerLocator: Non-invasive cancer diagnosis and tissue-of-origin  
914 prediction using methylation profiles of cell-free DNA. *Genome Biol.* **18**, 1–12 (2017).
- 915 8. Shen, S. Y. *et al.* Sensitive tumour detection and classification using plasma cell-free  
916 DNA methylomes. *Nature* **563**, 579–583 (2018).
- 917 9. Reinberg, D. & Vales, L. D. Chromatin domains rich in inheritance only certain histone  
918 posttranslational modifications qualify as being epigenetic. *Science (80-. )*. **361**, 33–34  
919 (2018).
- 920 10. Shema, E., Bernstein, B. E. & Buenrostro, J. D. Single-cell and single-molecule  
921 epigenomics to uncover genome regulation at unprecedented resolution. *Nat. Genet.* **51**,  
922 19–25 (2019).
- 923 11. Allis, C. D. & Jenuwein, T. The molecular hallmarks of epigenetic control. *Nat. Rev.*  
924 *Genet.* **17**, 487–500 (2016).
- 925 12. Mancarella, D. & Plass, C. Epigenetic signatures in cancer: proper controls, current  
926 challenges and the potential for clinical translation. *Genome Med.* *2021 131* **13**, 1–12  
927 (2021).
- 928 13. Sadeh, R. *et al.* ChIP-seq of plasma cell-free nucleosomes identifies gene expression  
929 programs of the cells of origin. *Nat. Biotechnol.* **39**, 586–598 (2021).
- 930 14. Gezer, U. *et al.* Histone methylation marks on circulating nucleosomes as novel blood-  
931 based biomarker in colorectal cancer. *Int. J. Mol. Sci.* **16**, 29654–29662 (2015).
- 932 15. Van den Ackerveken, P. *et al.* A novel proteomics approach to epigenetic profiling of  
933 circulating nucleosomes. *Sci. Rep.* **11**, 1–12 (2021).
- 934 16. Snyder, M. W., Kircher, M., Hill, A. J., Daza, R. M. & Shendure, J. Cell-free DNA  
935 Comprises an in Vivo Nucleosome Footprint that Informs Its Tissues-Of-Origin. *Cell* **164**,  
936 57–68 (2016).
- 937 17. Ulz, P. *et al.* Inferring expressed genes by whole-genome sequencing of plasma DNA.  
938 *Nat. Genet.* **48**, 1273–1278 (2016).

- 939 18. Sun, K. *et al.* Orientation-aware plasma cell-free DNA fragmentation analysis in open  
940 chromatin regions informs tissue of origin. *Genome Res.* **29**, 418–427 (2019).
- 941 19. Ferlay, J. *et al.* Cancer incidence and mortality worldwide: Sources, methods and major  
942 patterns in GLOBOCAN 2012. *Int. J. Cancer* **136**, E359–E386 (2015).
- 943 20. Hu, Z. *et al.* Quantitative evidence for early metastatic seeding in colorectal cancer. *Nat.*  
944 *Genet.* **51**, 1113–1122 (2019).
- 945 21. Shema, E. *et al.* Single-molecule decoding of combinatorially modified nucleosomes.  
946 *Science (80-. )*. **352**, 717–721 (2016).
- 947 22. Heintzman, N. D. *et al.* Distinct and predictive chromatin signatures of transcriptional  
948 promoters and enhancers in the human genome. *Nat. Genet.* **39**, 311–318 (2007).
- 949 23. Barski, A. *et al.* High-Resolution Profiling of Histone Methylations in the Human  
950 Genome. *Cell* **129**, 823–837 (2007).
- 951 24. Tiernan, J. P. *et al.* Carcinoembryonic antigen is the preferred biomarker for in vivo  
952 colorectal cancer targeting. *Br. J. Cancer* **108**, 662–667 (2013).
- 953 25. Meng, C. *et al.* TIMP-1 is a novel serum biomarker for the diagnosis of colorectal cancer:  
954 A meta-analysis. *PLoS One* **13**, e0207039 (2018).
- 955 26. Yu, J. *et al.* Identification of MST1 as a potential early detection biomarker for colorectal  
956 cancer through a proteomic approach. *Sci. Rep.* **7**, (2017).
- 957 27. Mandal, S. *et al.* Direct Kinetic Fingerprinting for High-Accuracy Single-Molecule  
958 Counting of Diverse Disease Biomarkers. *Acc. Chem. Res.* (2020).  
959 doi:10.1021/acs.accounts.0c00621
- 960 28. Furth, N. *et al.* Unified platform for genetic and serological detection of COVID-19 with  
961 single-molecule technology. *PLoS One* **16**, e0255096 (2021).
- 962 29. Nakayama, M. & Oshima, M. Mutant p53 in colon cancer. *J. Mol. Cell Biol.* **11**, 267–276  
963 (2019).
- 964 30. Jung, G., Hernández-Illán, E., Moreira, L., Balaguer, F. & Goel, A. Epigenetics of  
965 colorectal cancer: biomarker and therapeutic potential. *Nat. Rev. Gastroenterol. Hepatol.*  
966 **17**, 111–130 (2020).
- 967 31. Dawson, M. A. The cancer epigenome: Concepts, challenges, and therapeutic  
968 opportunities. *Science (80-. )*. **355**, 1147–1152 (2017).
- 969 32. Wood, K. H. & Zhou, Z. Emerging molecular and biological functions of MBD2, a reader  
970 of DNA methylation. *Front. Genet.* **7**, (2016).
- 971 33. Bettegowda, C. *et al.* Detection of circulating tumor DNA in early- and late-stage human  
972 malignancies. *Sci. Transl. Med.* **6**, 224ra24–224ra24 (2014).
- 973 34. Brown, R., Curry, E., Magnani, L., Wilhelm-Benartzi, C. S. & Borley, J. Poised  
974 epigenetic states and acquired drug resistance in cancer. *Nat. Rev. Cancer* **14**, 747–753  
975 (2014).
- 976 35. Kerachian, M. A. *et al.* Crosstalk between DNA methylation and gene expression in  
977 colorectal cancer, a potential plasma biomarker for tracing this tumor. *Sci. Rep.* **10**, 1–13  
978 (2020).

- 979 36. King, W. D. *et al.* A cross-sectional study of global DNA methylation and risk of  
980 colorectal adenoma. *BMC Cancer* **14**, 1–9 (2014).
- 981 37. Frederiksen, C. *et al.* Plasma TIMP-1 levels and treatment outcome in patients treated  
982 with XELOX for metastatic colorectal cancer. *Ann. Oncol.* **22**, 369–375 (2011).
- 983 38. Li, W. *et al.* 5-Hydroxymethylcytosine signatures in circulating cell-free DNA as  
984 diagnostic biomarkers for human cancers. *Cell Res.* **27**, 1243–1257 (2017).
- 985 39. Lio, C. W. J., Yuita, H. & Rao, A. Dysregulation of the TET family of epigenetic  
986 regulators in lymphoid and myeloid malignancies. *Blood* **134**, 1487–1497 (2019).
- 987 40. Zhang, L. *et al.* Tet-mediated covalent labelling of 5-methylcytosine for its genome-wide  
988 detection and sequencing. *Nat. Commun.* **4**, (2013).
- 989 41. Song, C. X. *et al.* 5-Hydroxymethylcytosine signatures in cell-free DNA provide  
990 information about tumor types and stages. *Cell Res.* **27**, 1231–1242 (2017).
- 991 42. Newman, A. M. *et al.* Integrated digital error suppression for improved detection of  
992 circulating tumor DNA. *Nat. Biotechnol.* **34**, 547–555 (2016).
- 993 43. Chandradoss, S. D. *et al.* Surface passivation for single-molecule protein studies. *J. Vis.*  
994 *Exp.* (2014). doi:10.3791/50549
- 995 44. Fleischhacker, M. & Schmidt, B. Circulating nucleic acids (CNAs) and cancer-A survey.  
996 *Biochim. Biophys. Acta - Rev. Cancer* **1775**, 181–232 (2007).
- 997 45. Harris, T. D. *et al.* Single-Molecule DNA Sequencing of a Viral Genome. *Science (80-. )*.  
998 **320**, 106–109 (2008).
- 999
